# Supplementary material
Source: PubMed Central journal article supplement (PMC3399043)

## Supplemental Material 2

Colormaps show the number of steps to settle and the period length once settled for all rules 0 to 255. The values of  $\tau_p$  and  $\tau_n$  vary across the x- and y-axis, respectively. Each rule was run from 5 different initial configurations, and the results were averaged to produce each figure. Some rules exhibit short settle times and short periods (e.g. rules 0, 51, 196), while others show very long settle times and periods (e.g. 41, 129, 135).

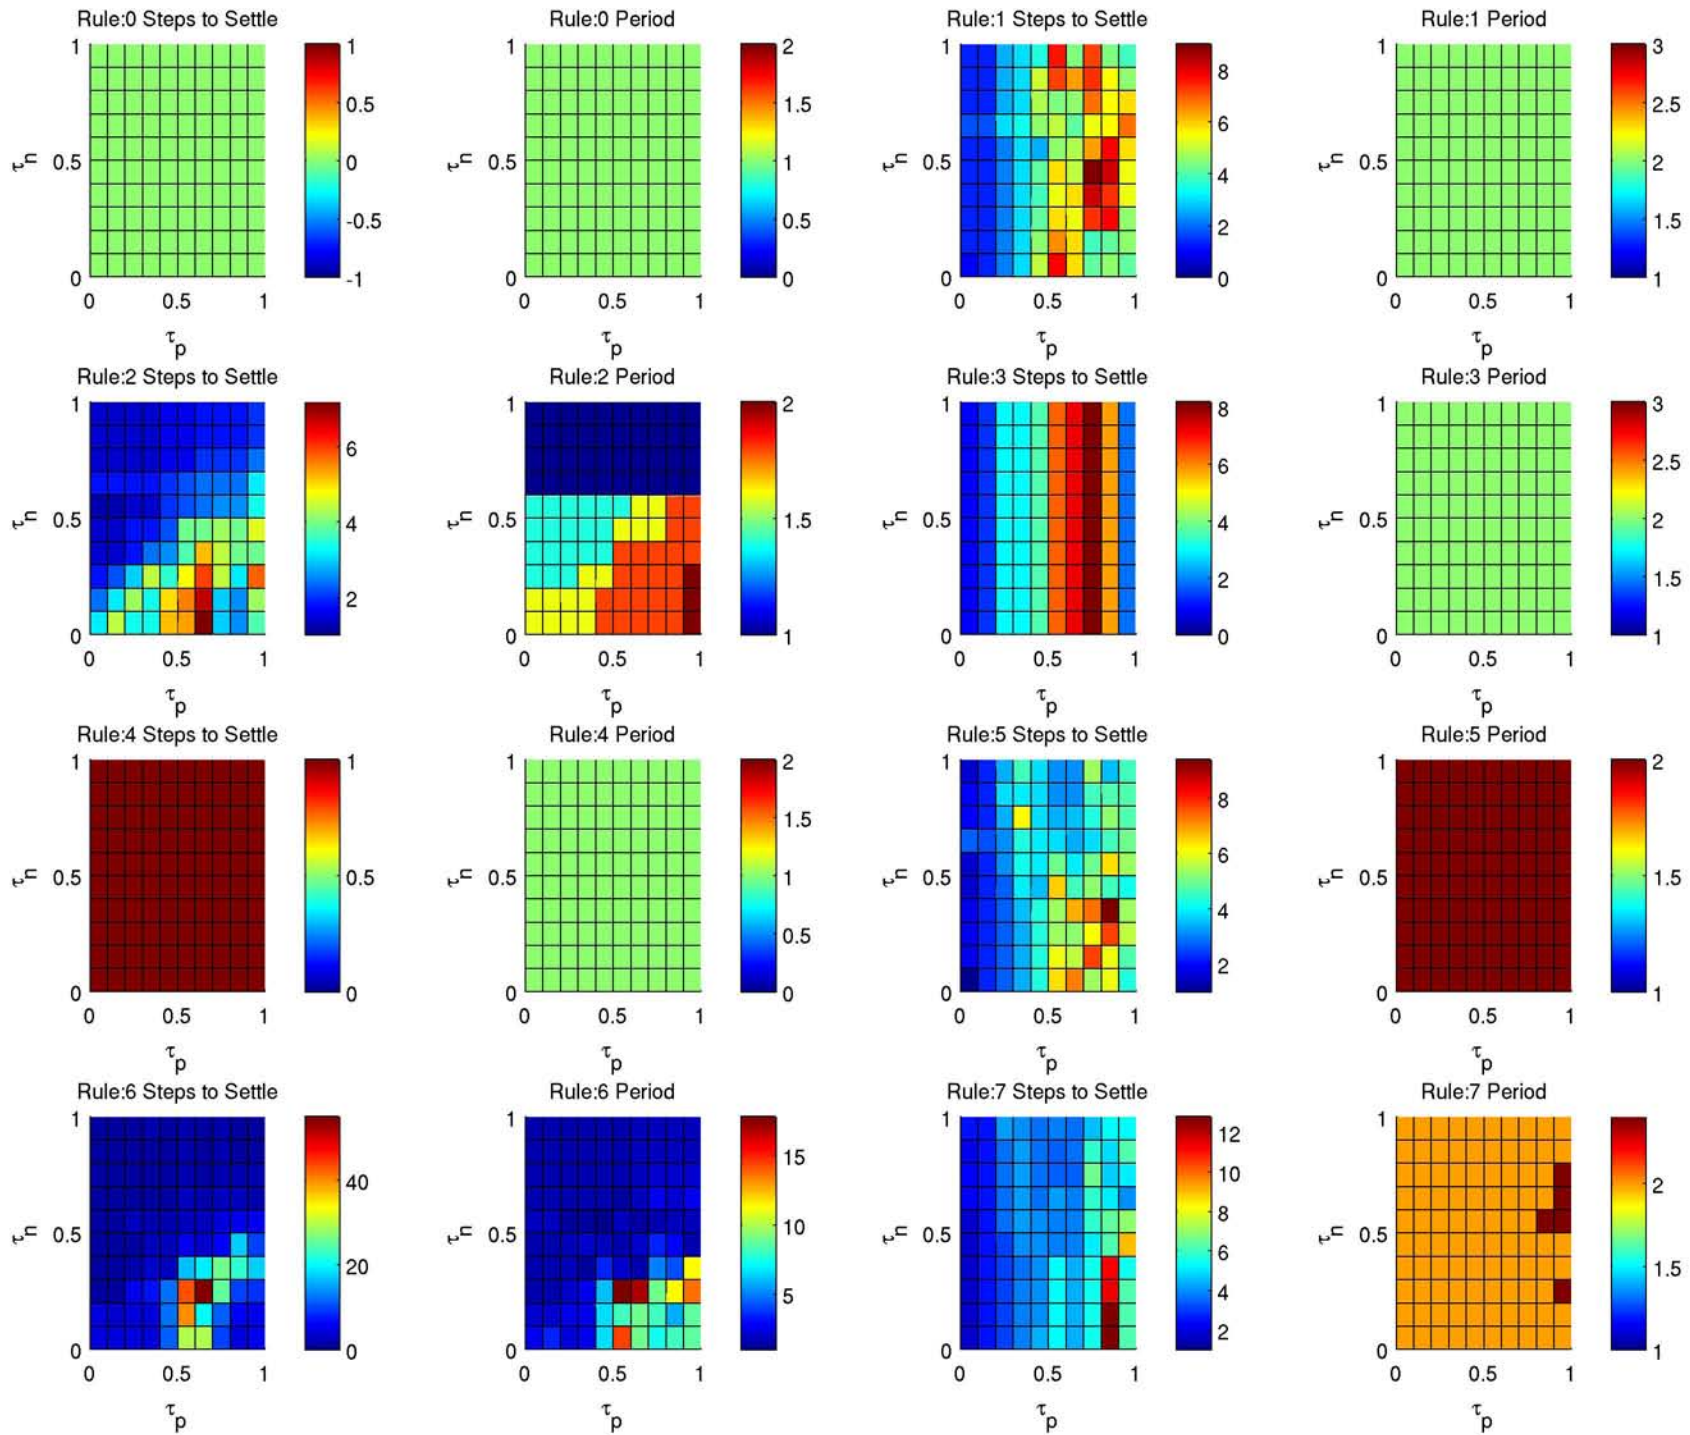

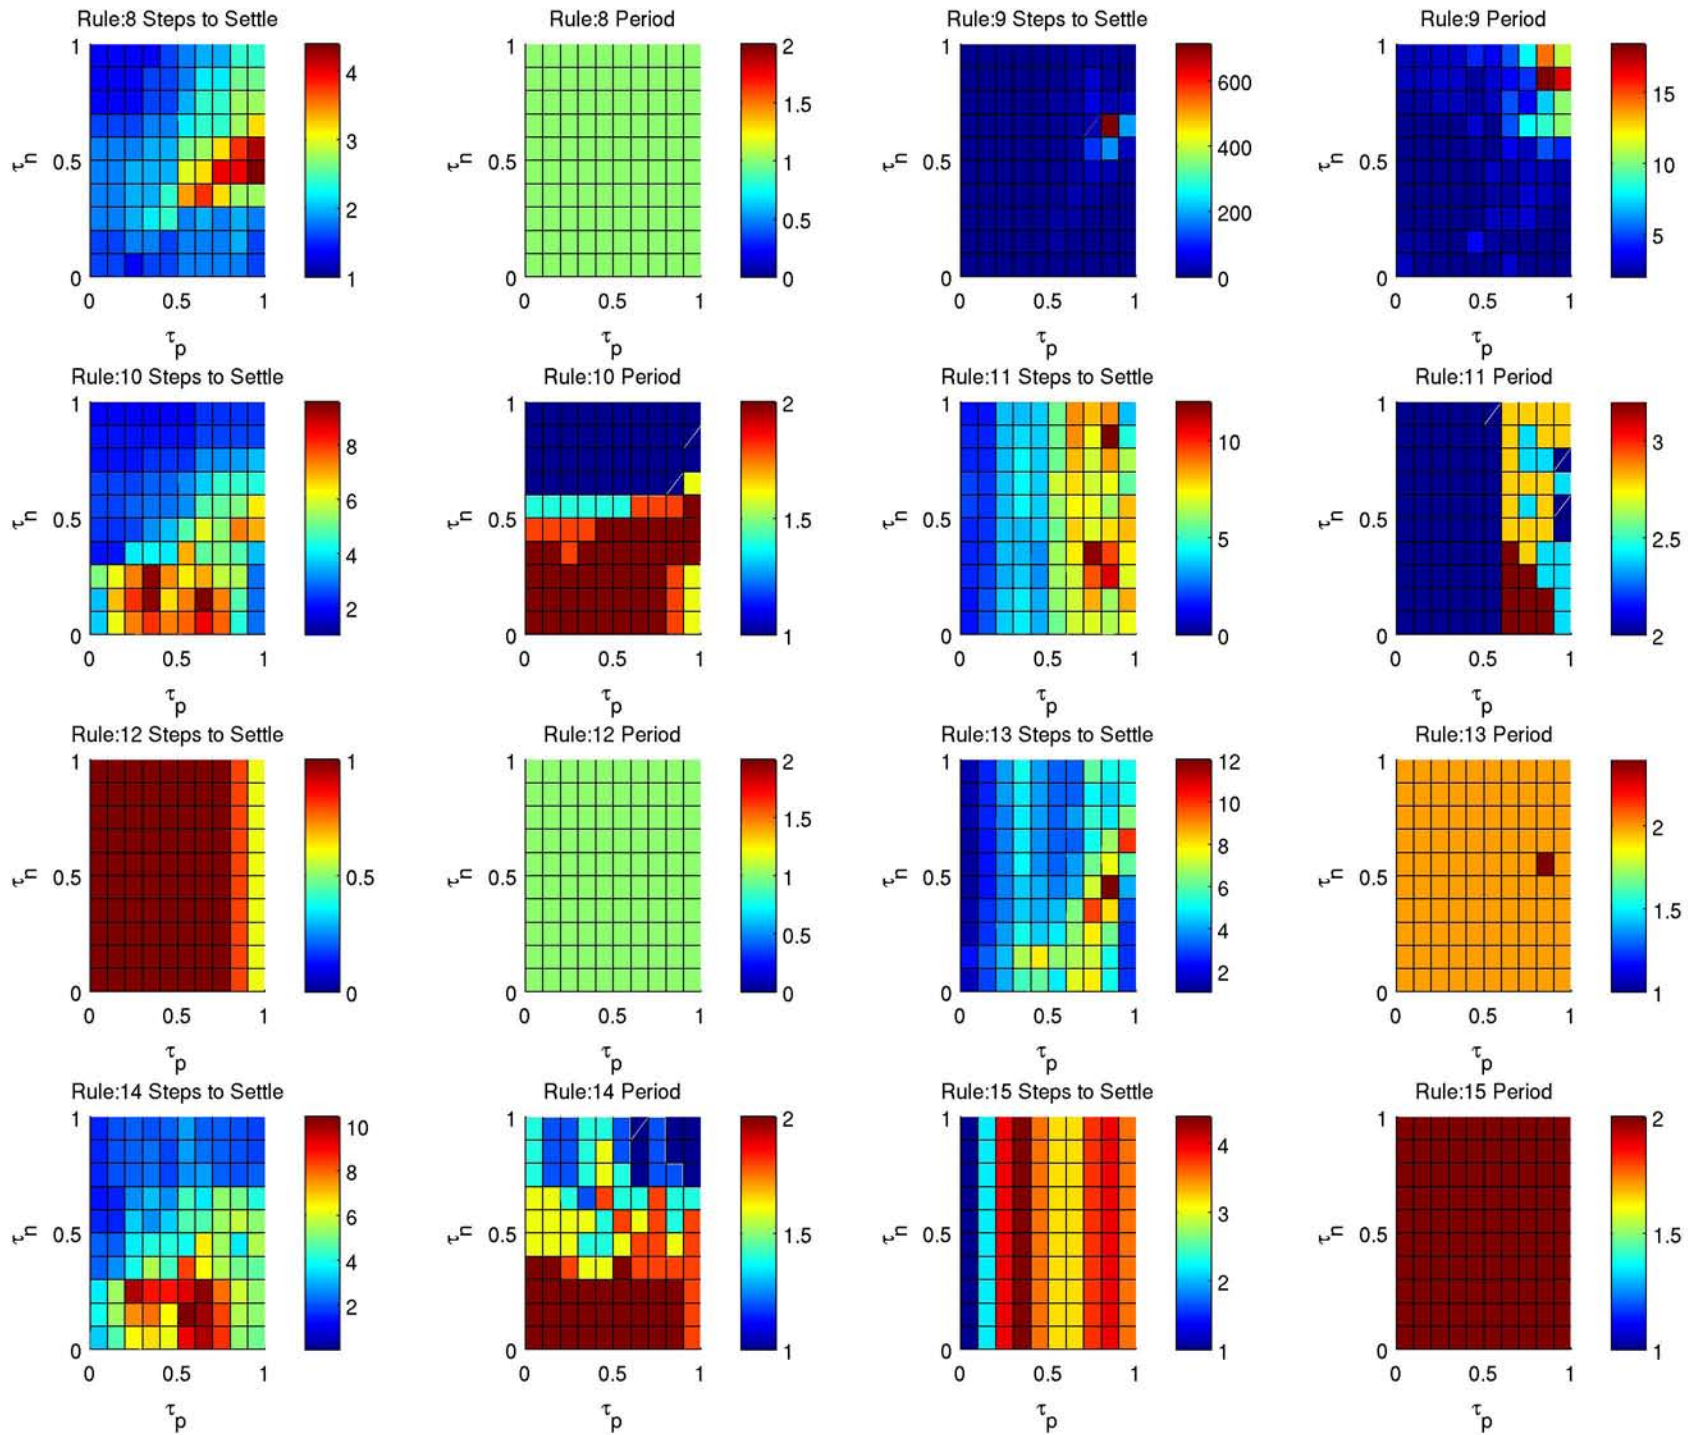

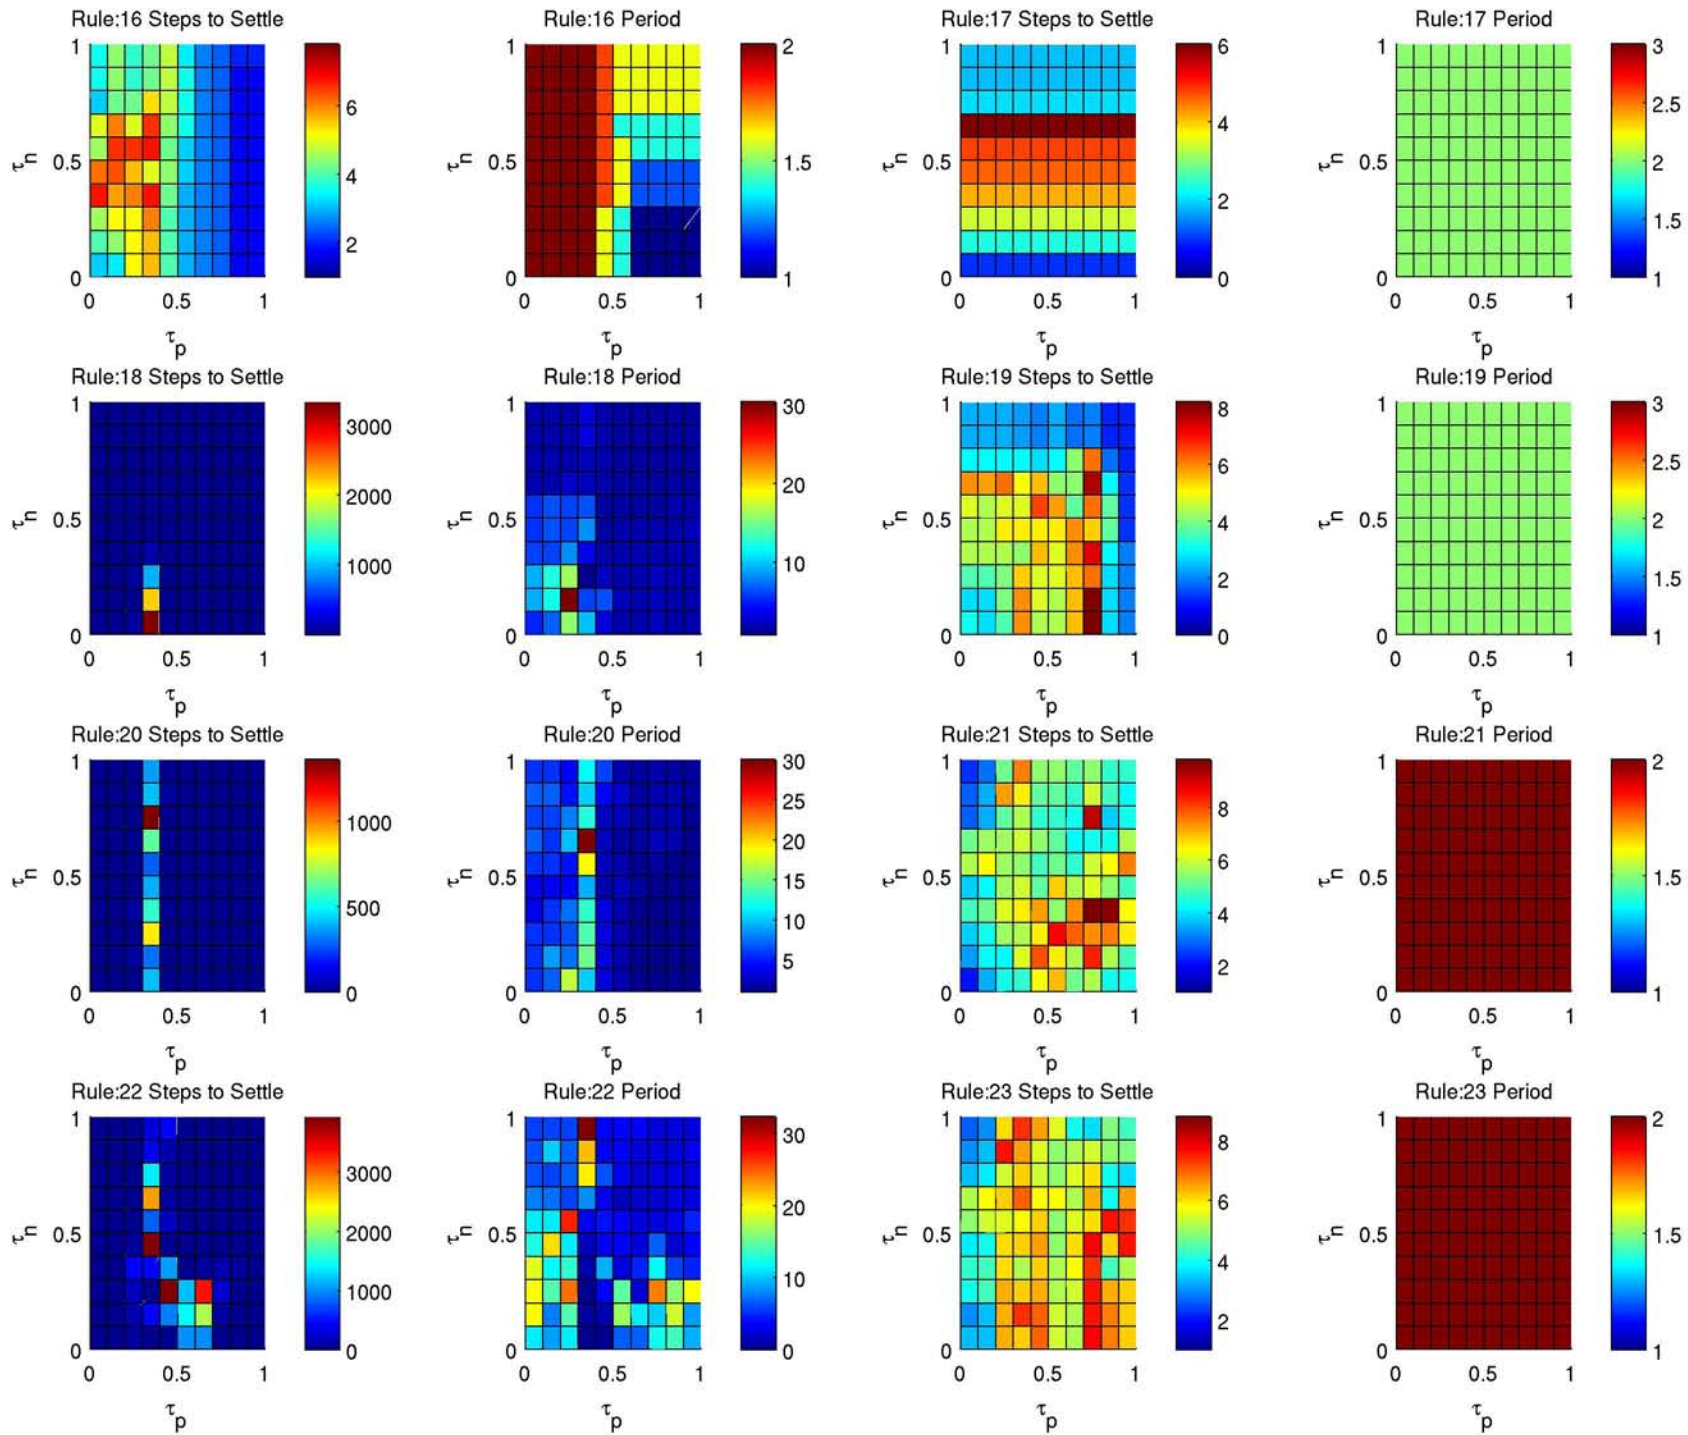

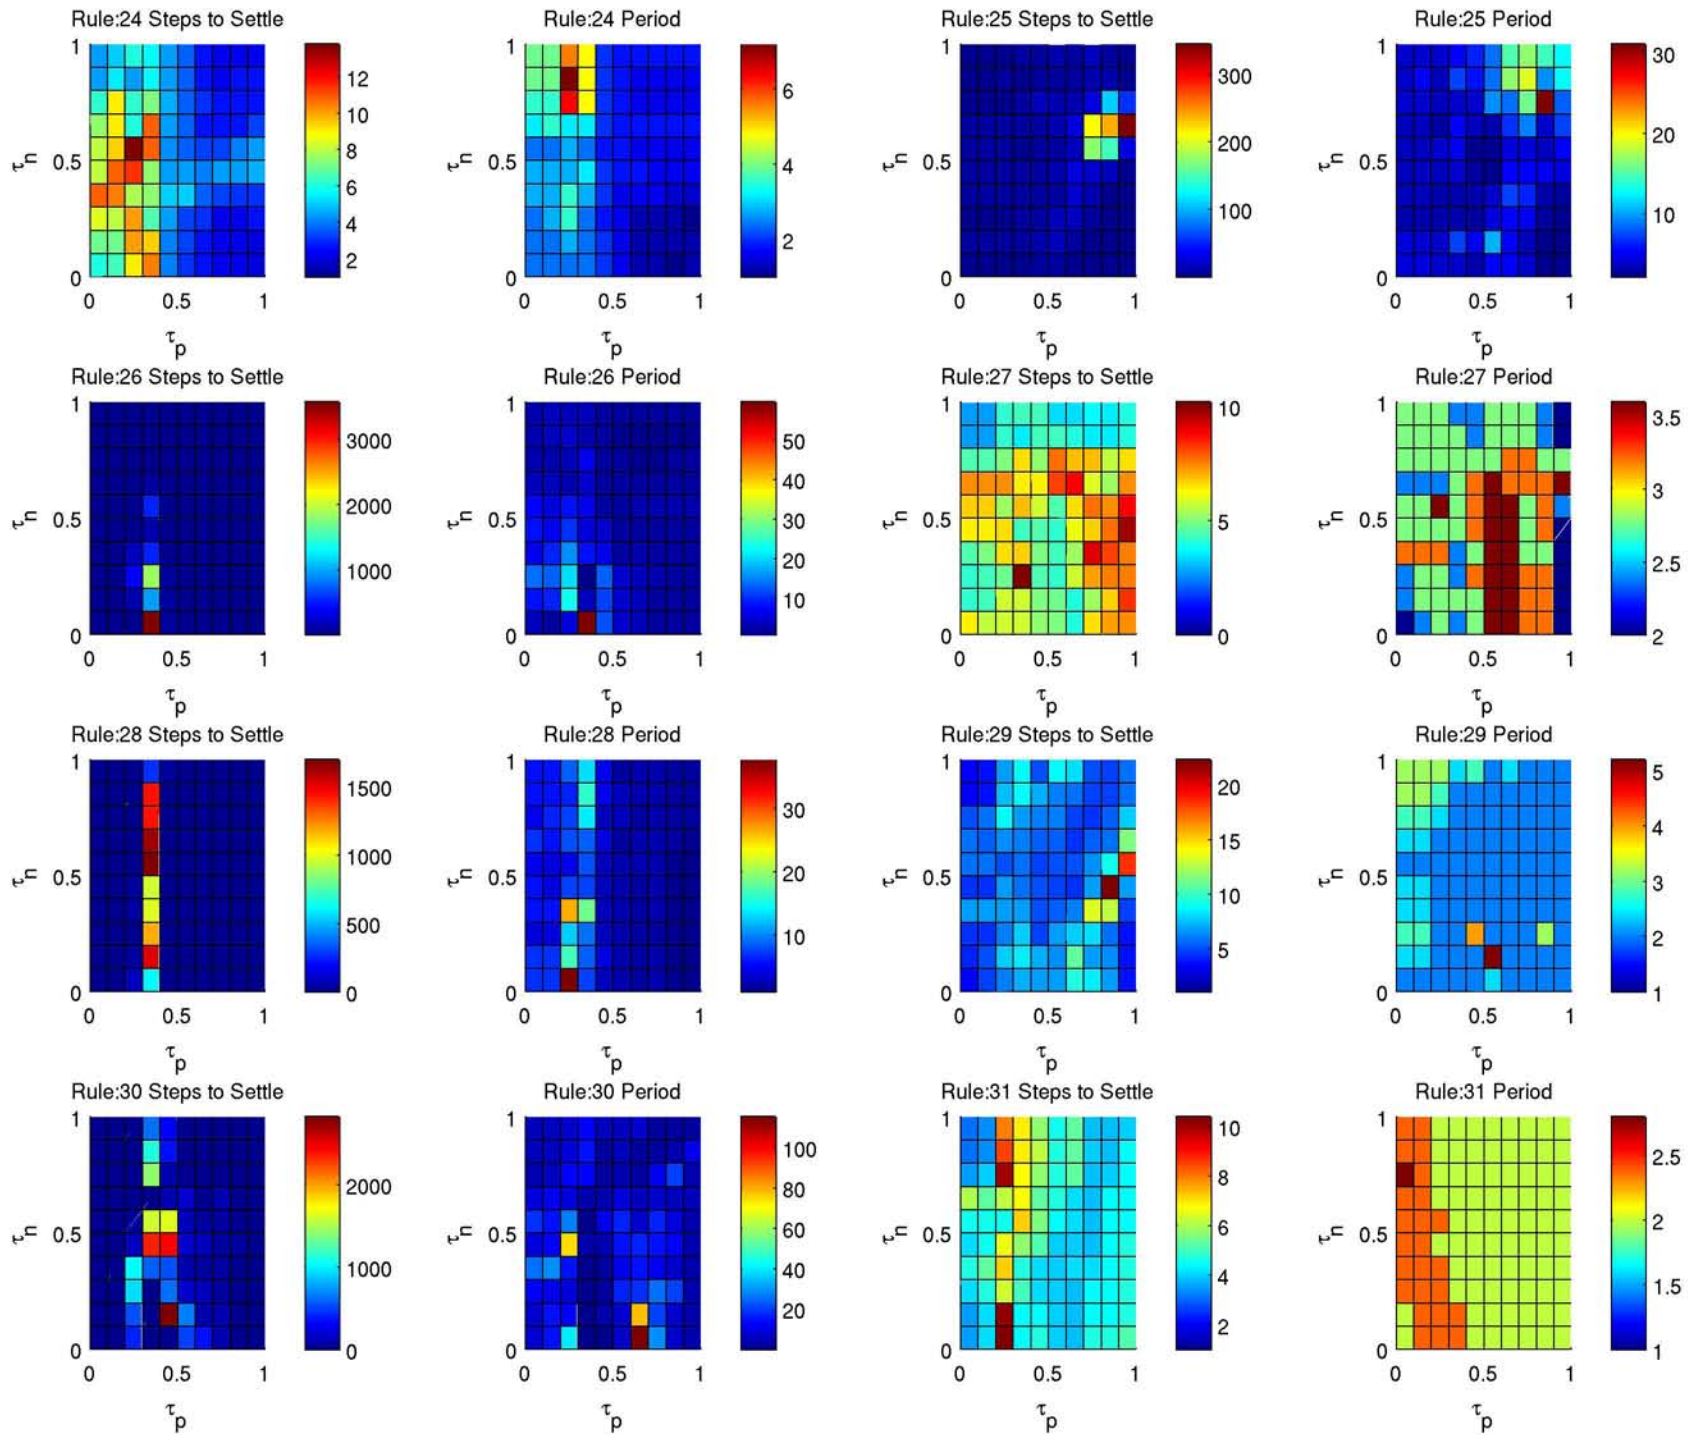

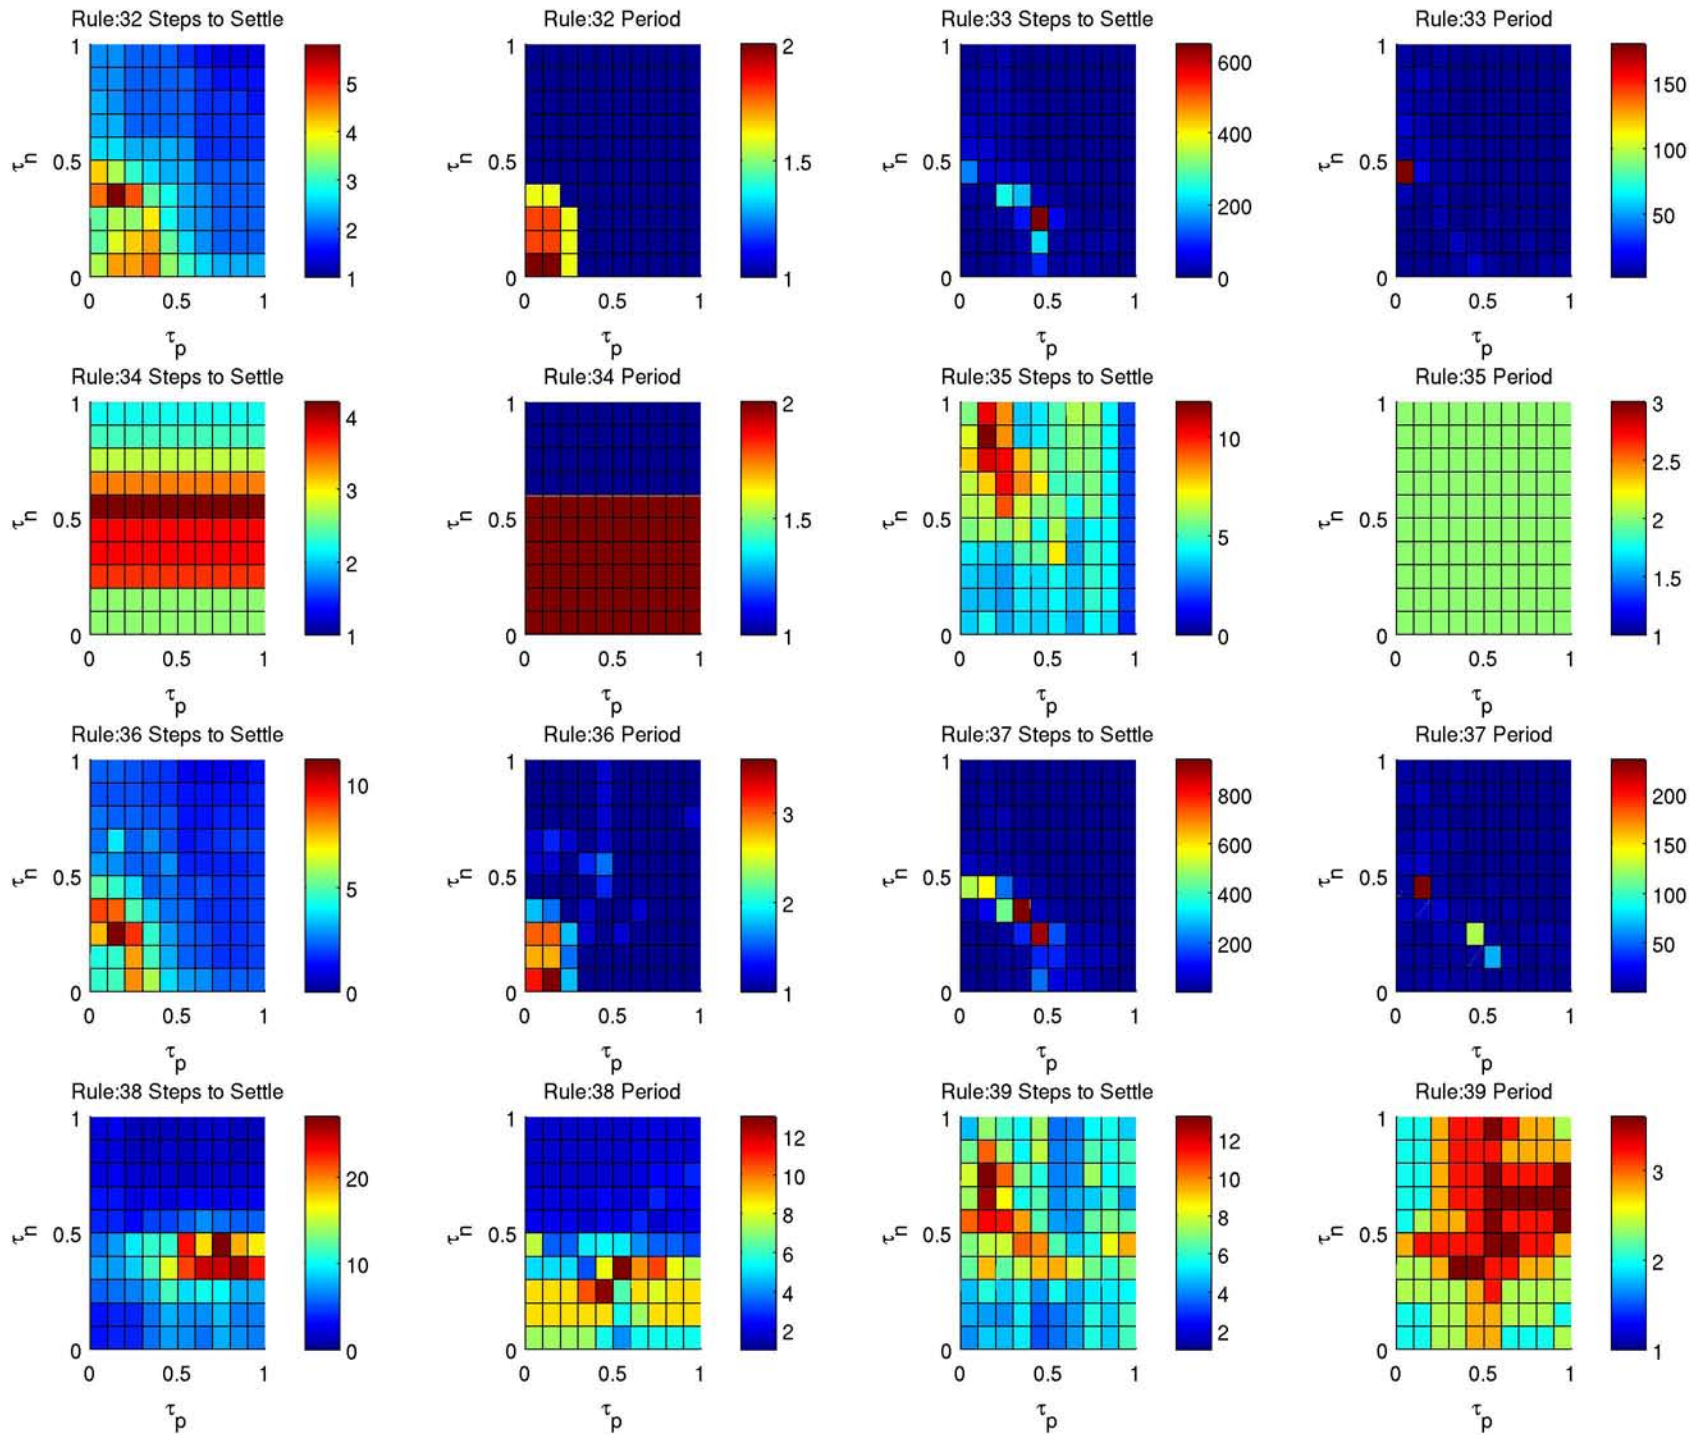

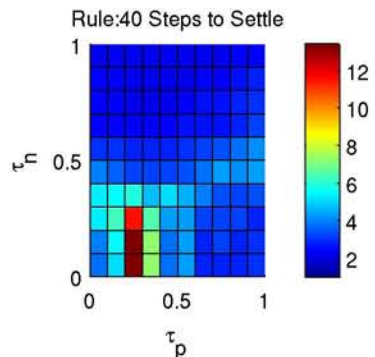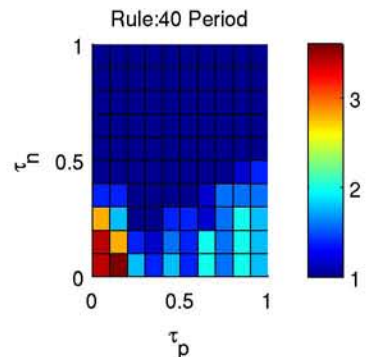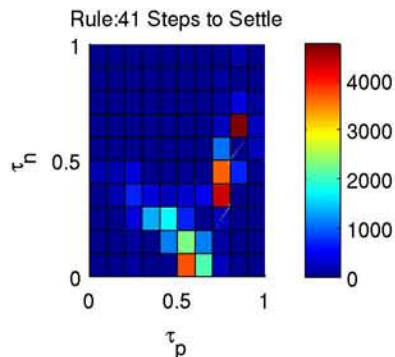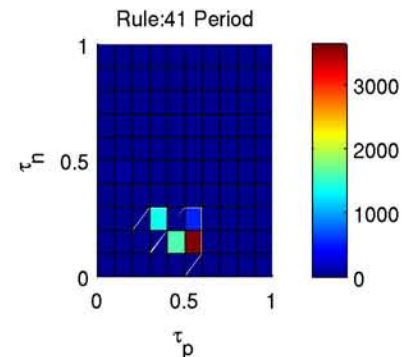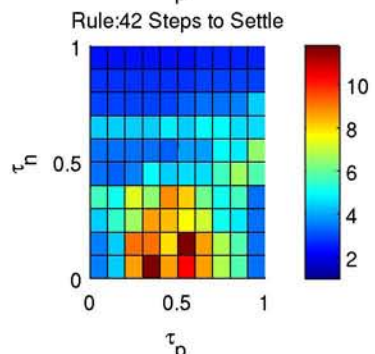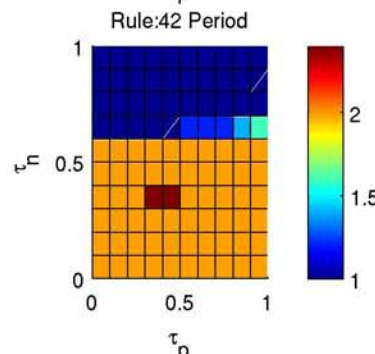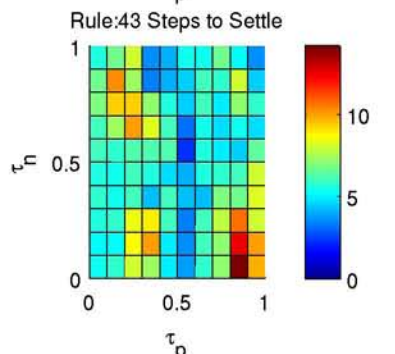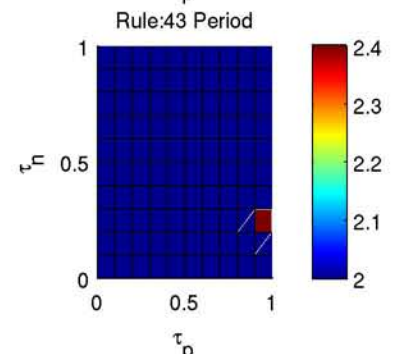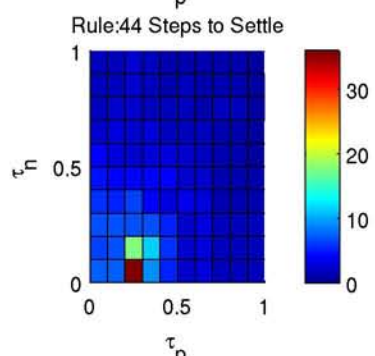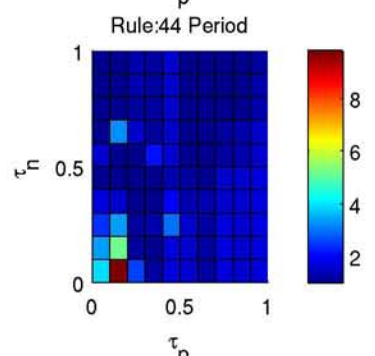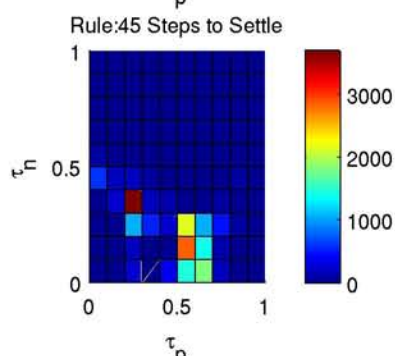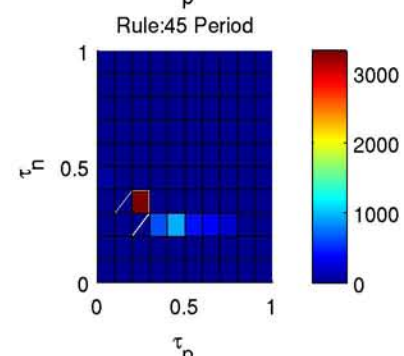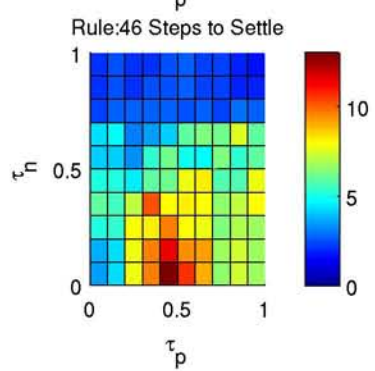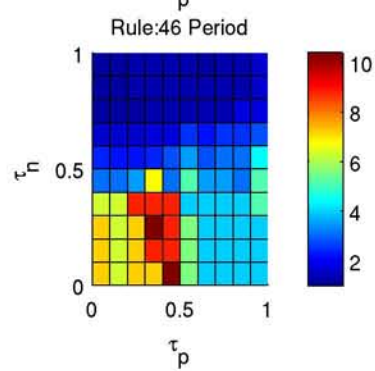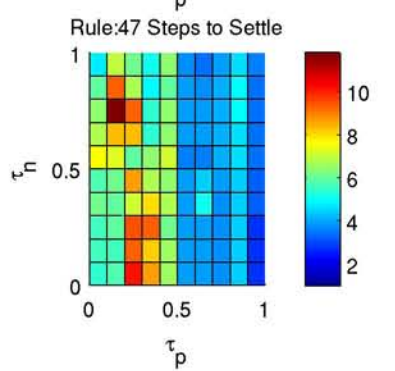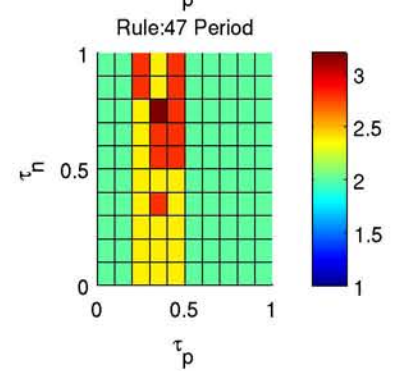

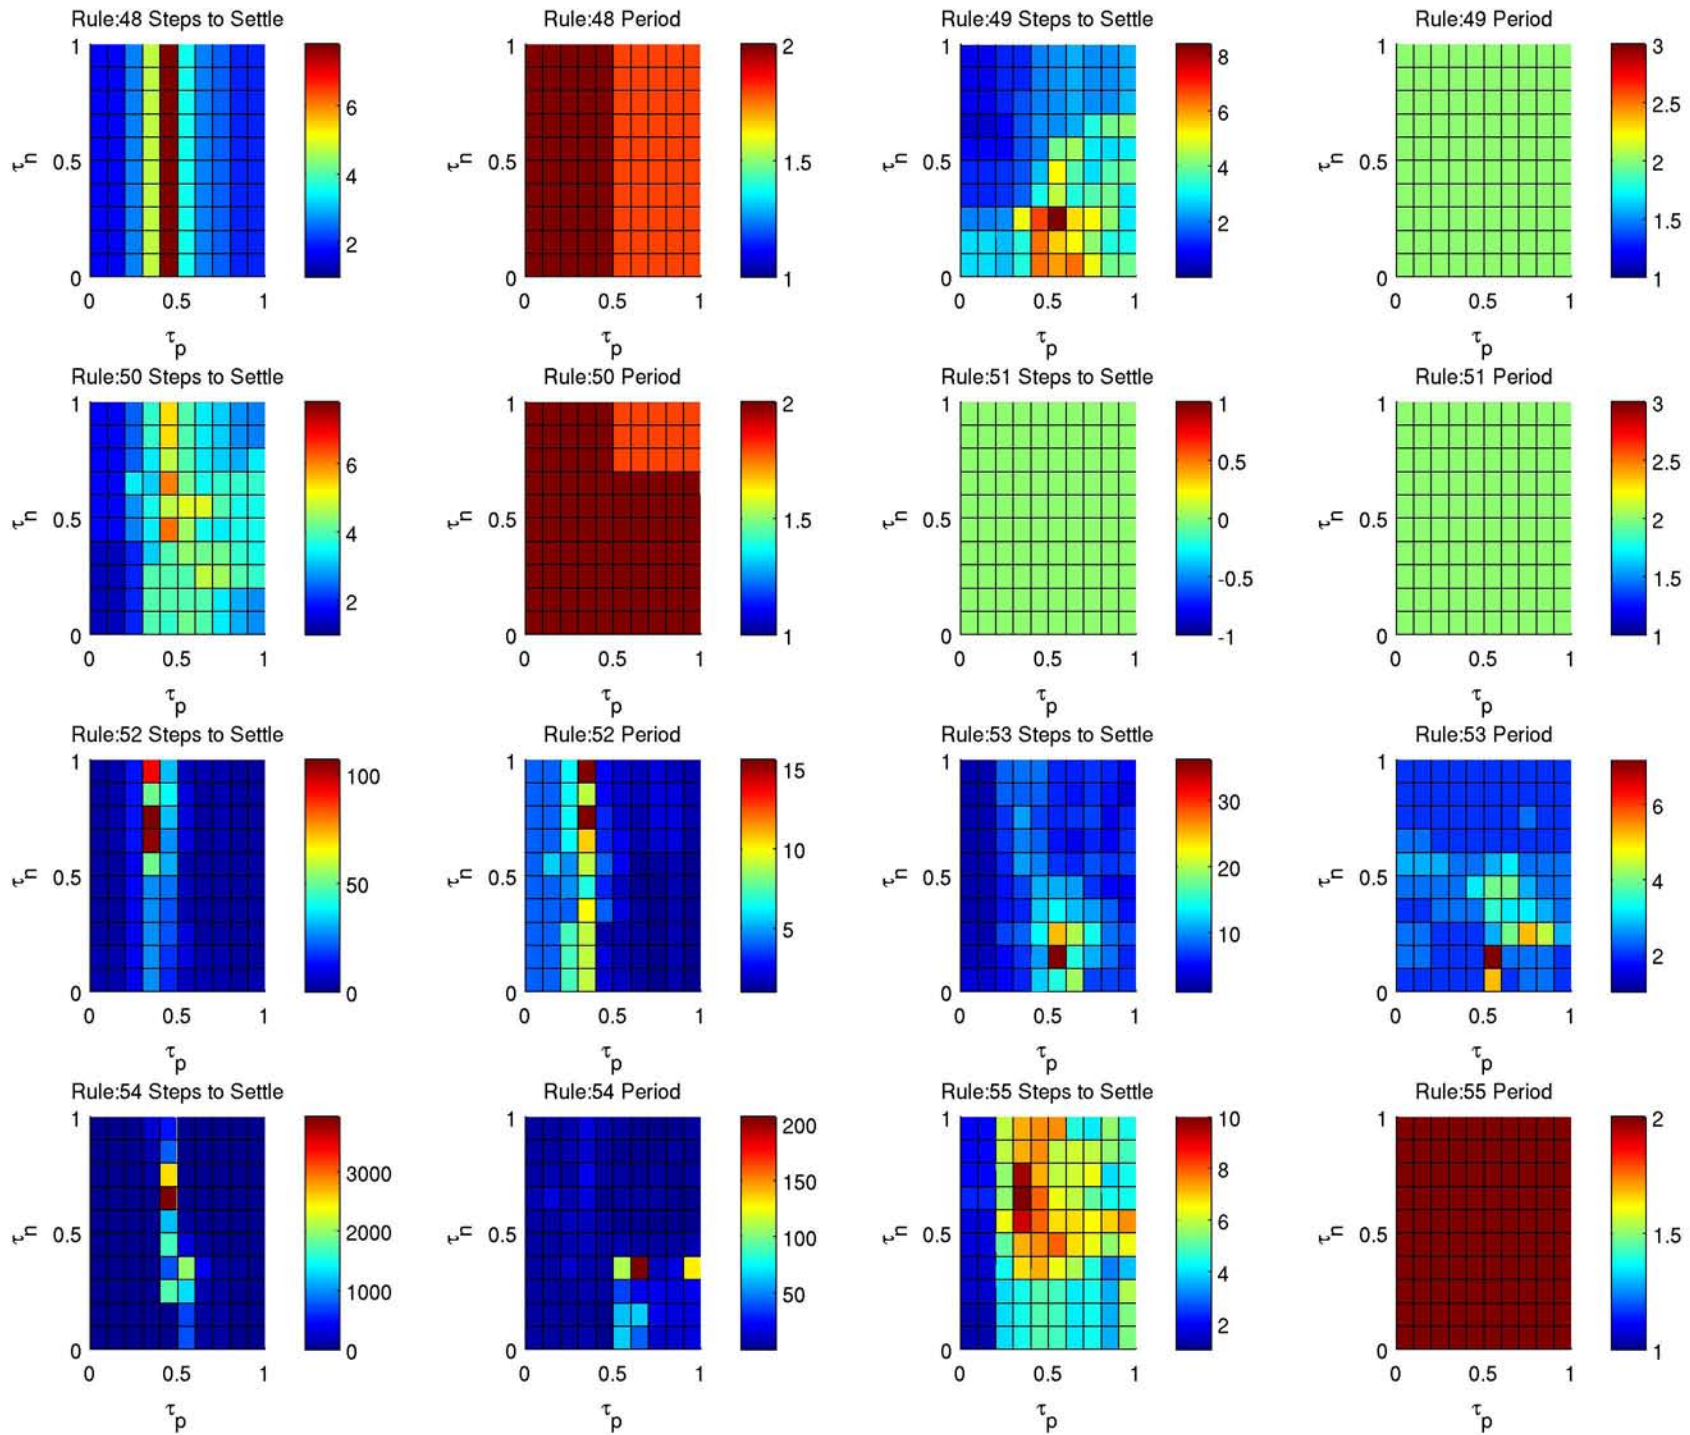



Rule:56 Steps to Settle

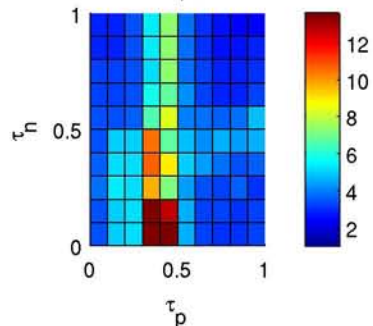

Rule:56 Period

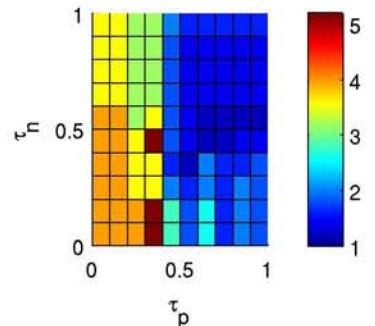

Rule:57 Steps to Settle

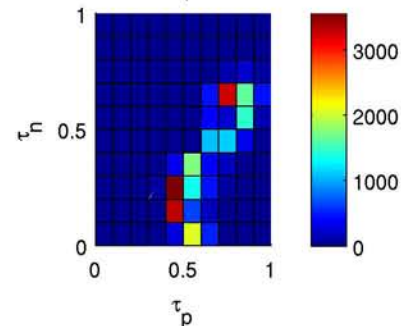

Rule:57 Period

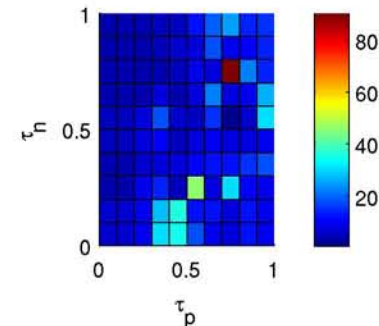

Rule:58 Steps to Settle

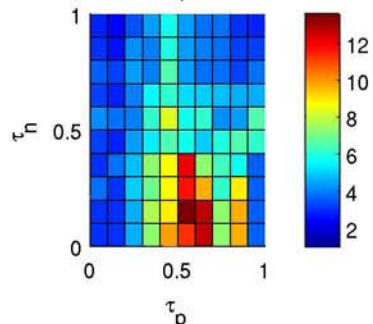

Rule:58 Period

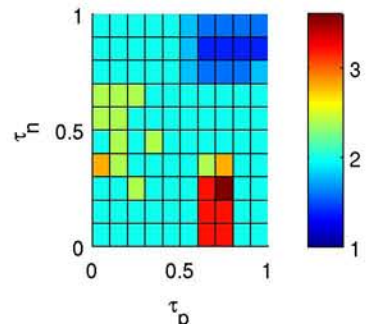

Rule:59 Steps to Settle

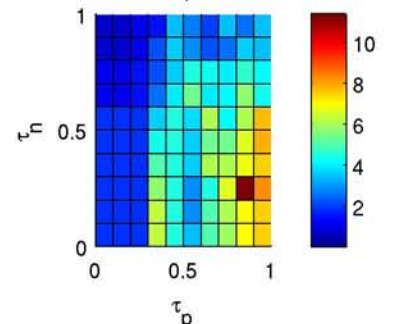

Rule:59 Period

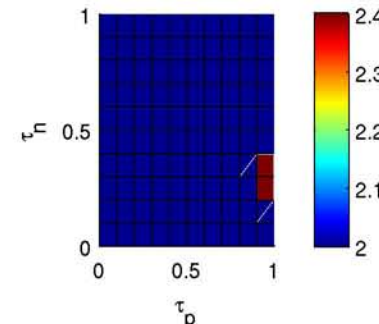

Rule:60 Steps to Settle

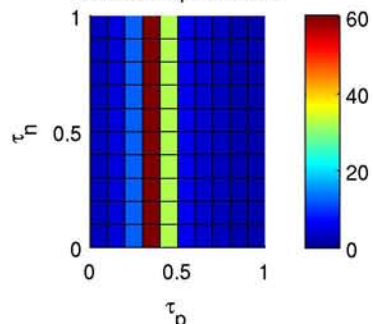

Rule:60 Period

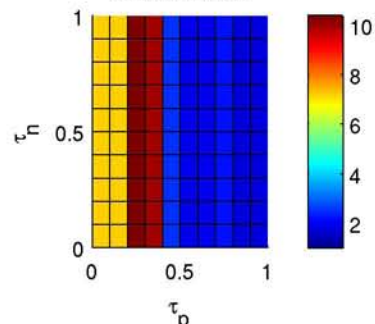

Rule:61 Steps to Settle

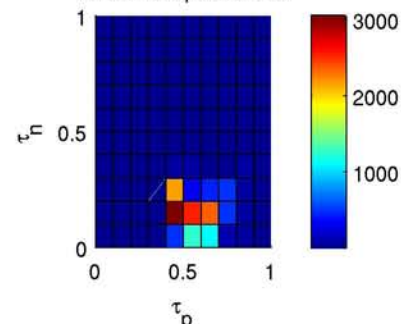

Rule:61 Period

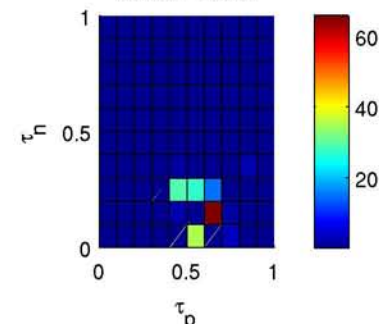

Rule:62 Steps to Settle

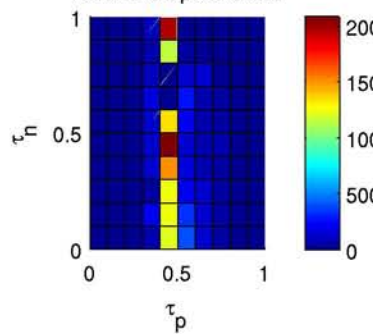

Rule:62 Period

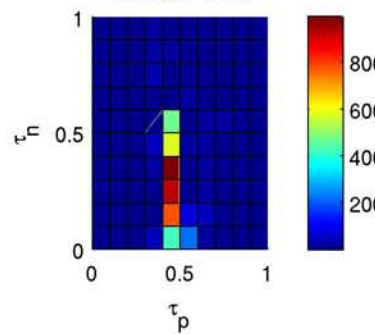

Rule:63 Steps to Settle

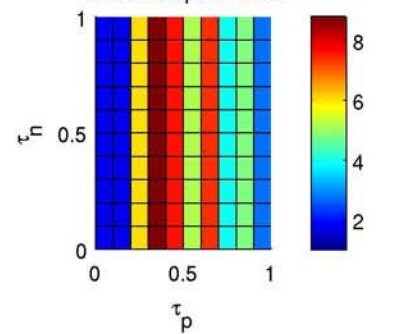

Rule:63 Period

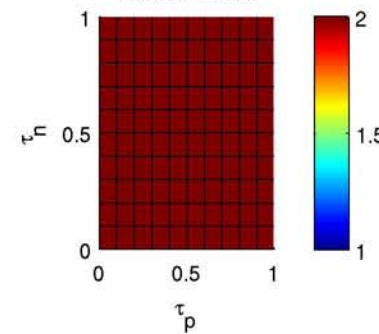

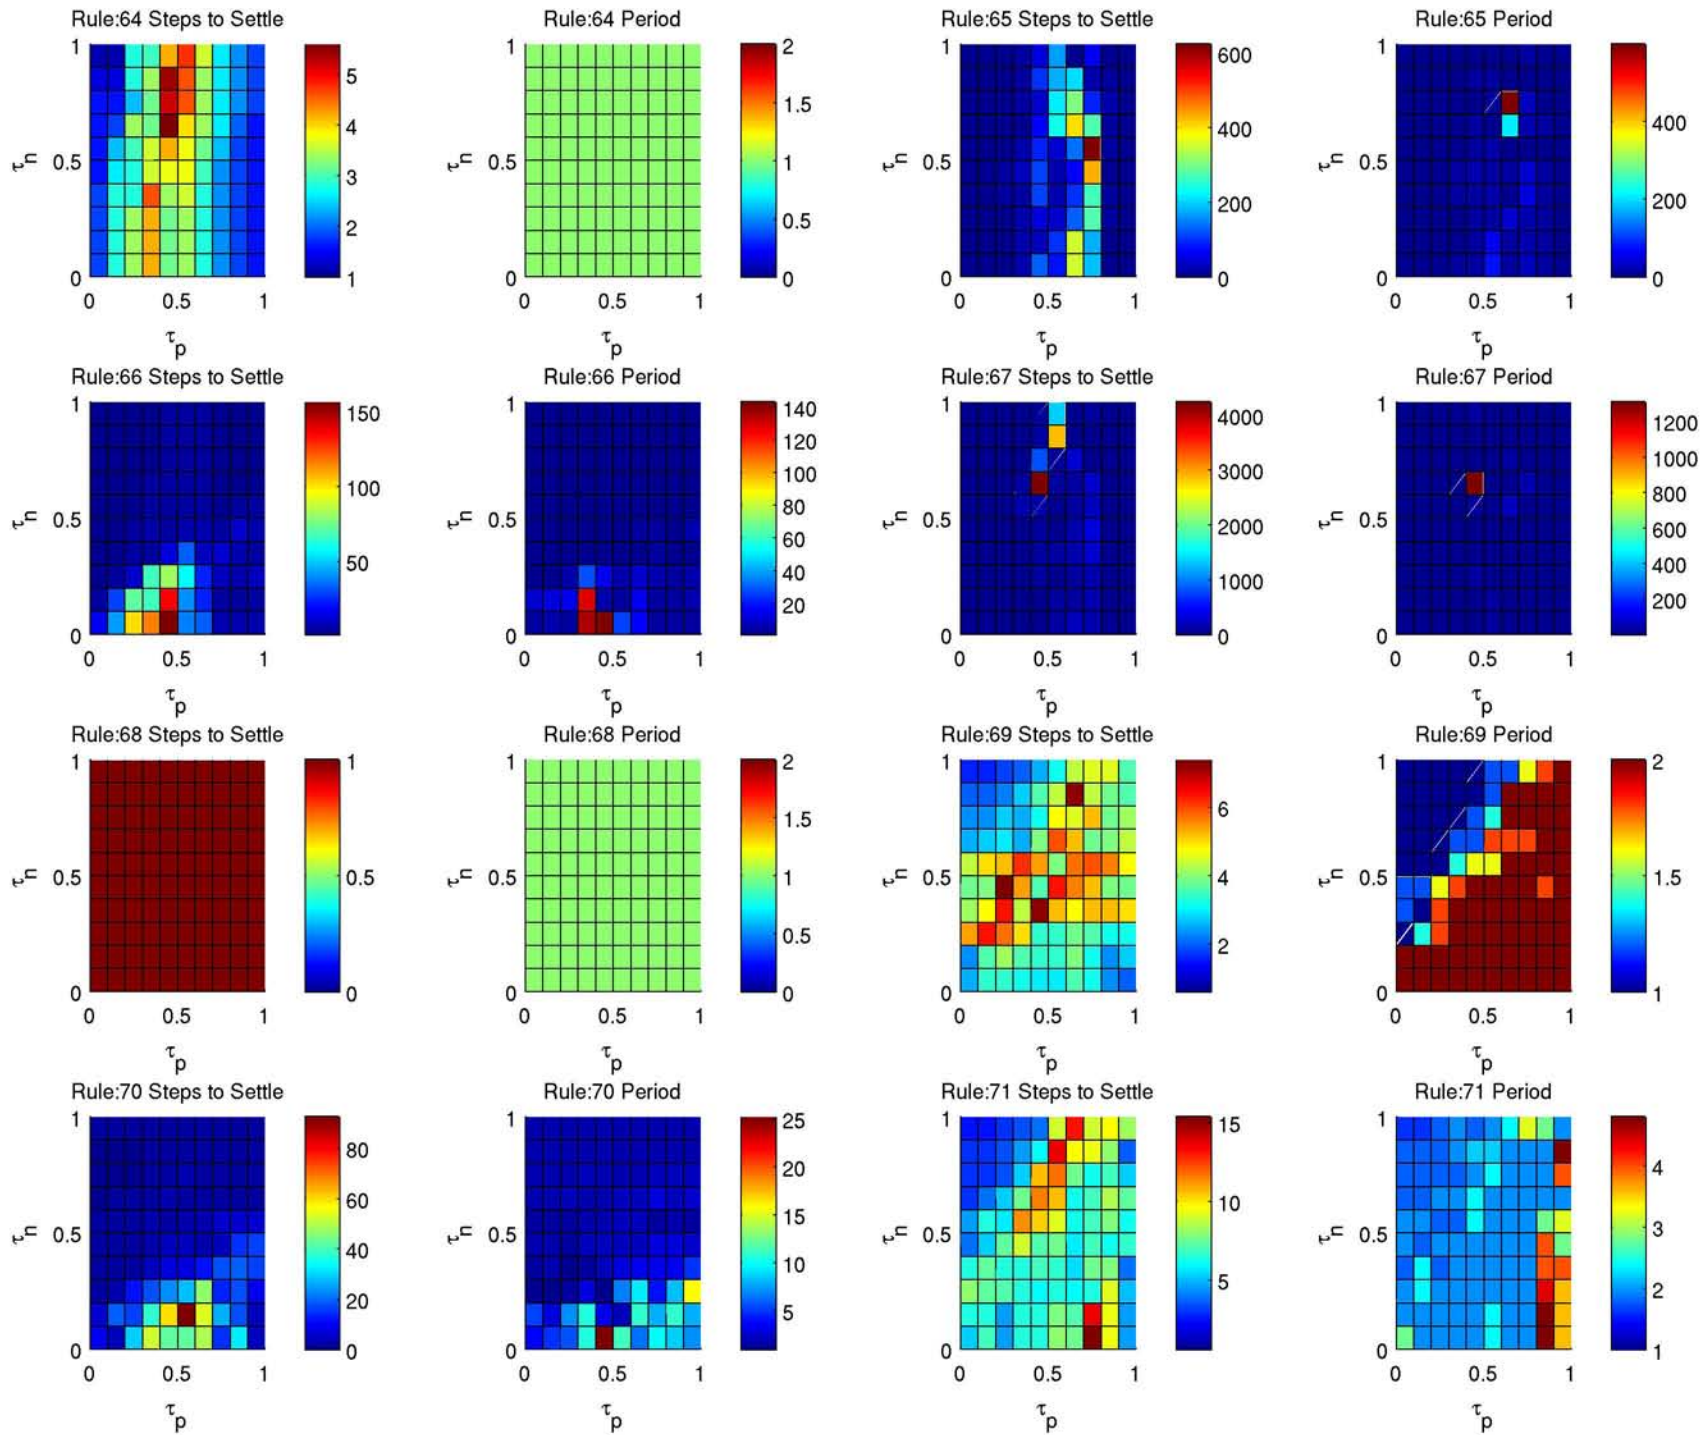

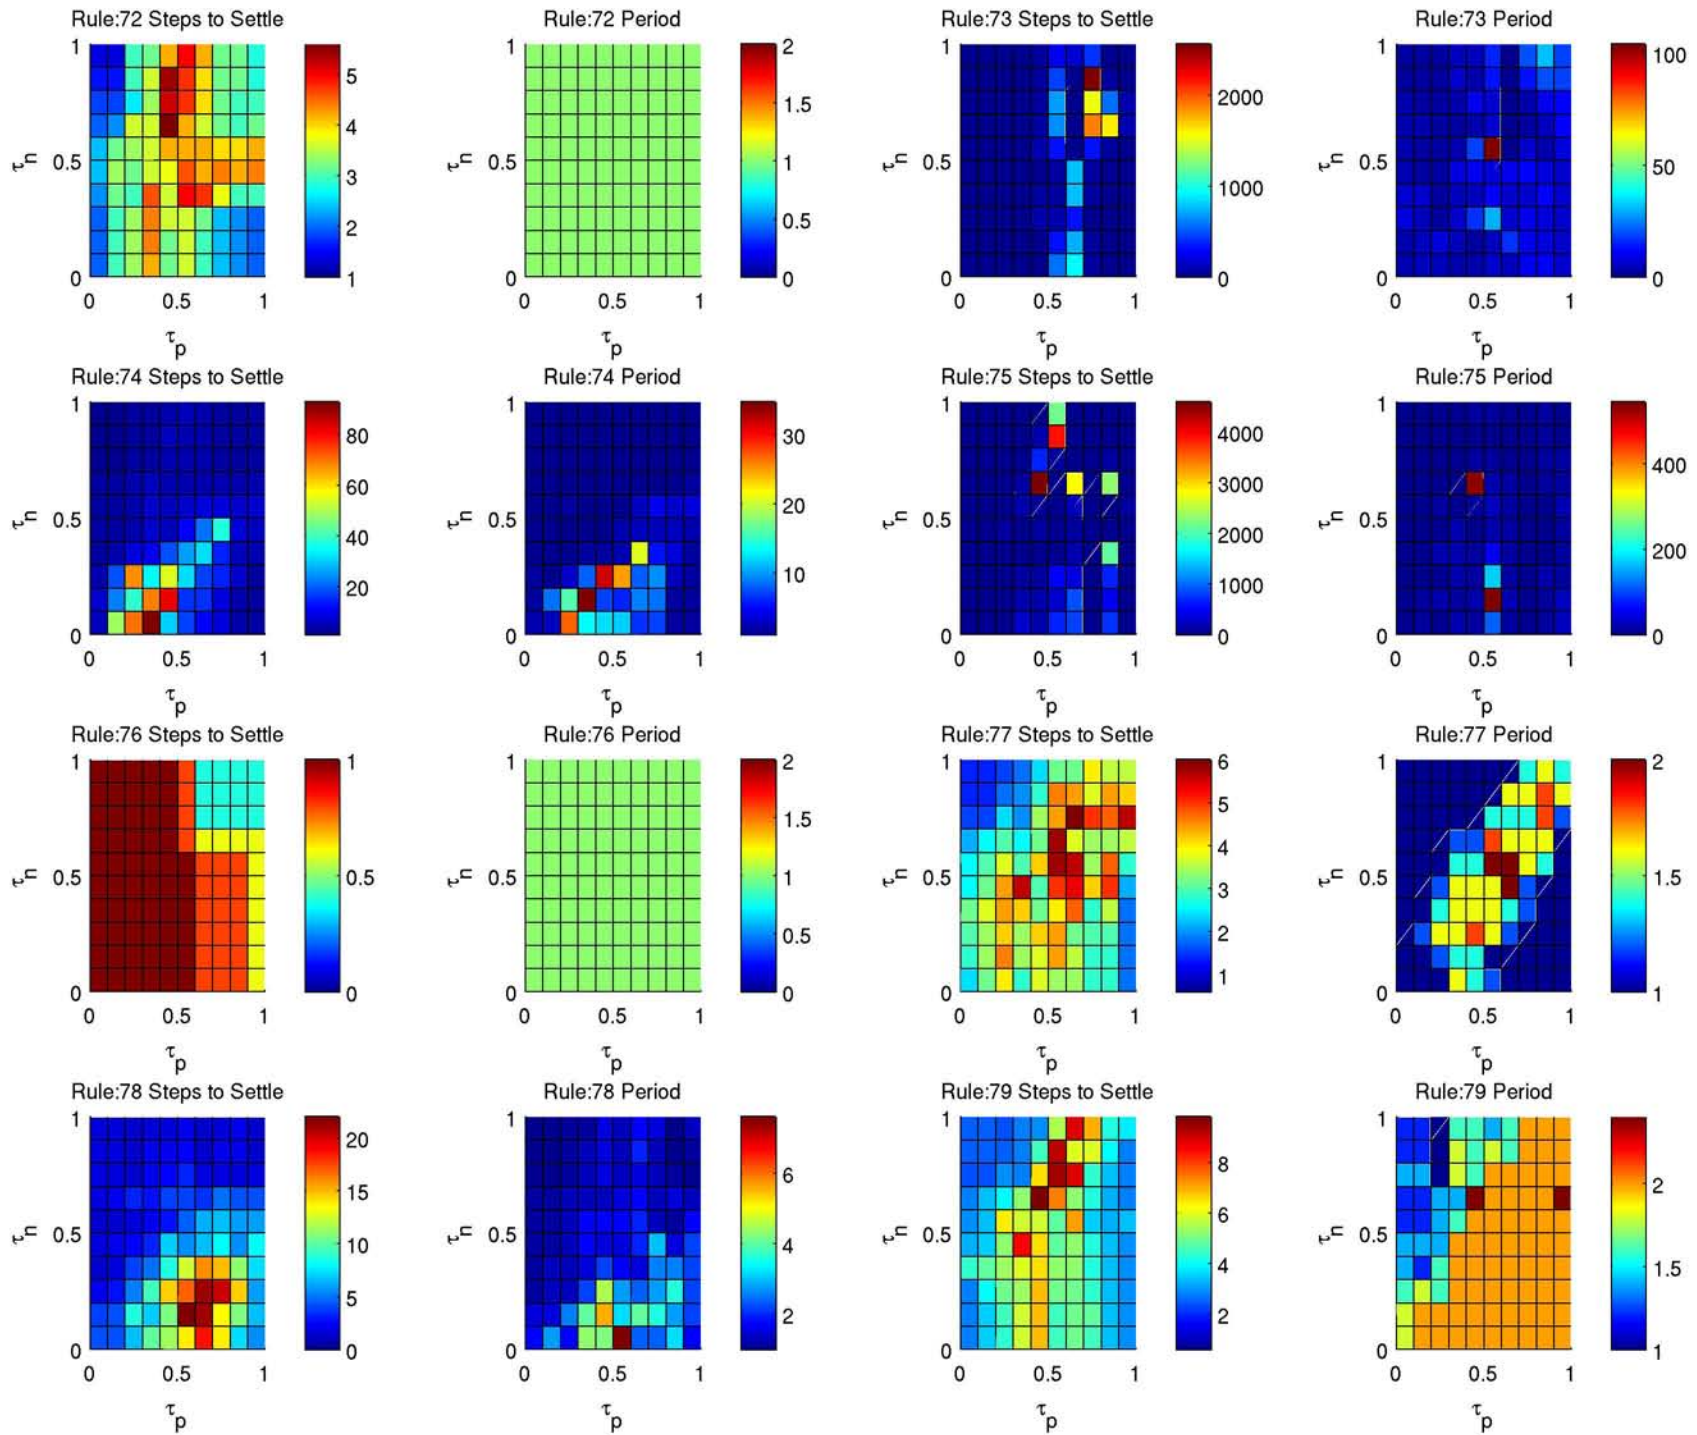



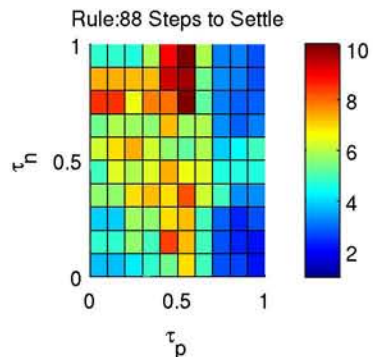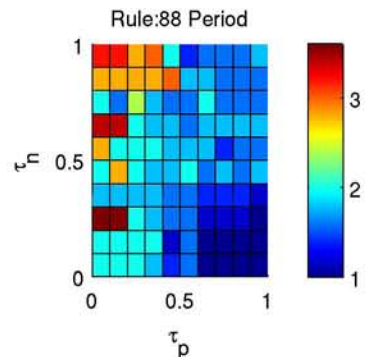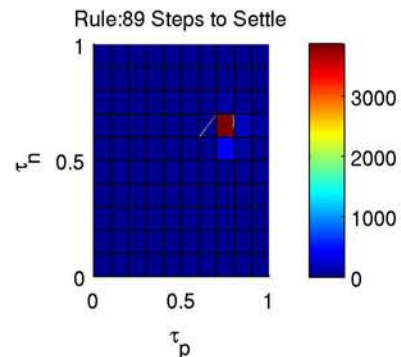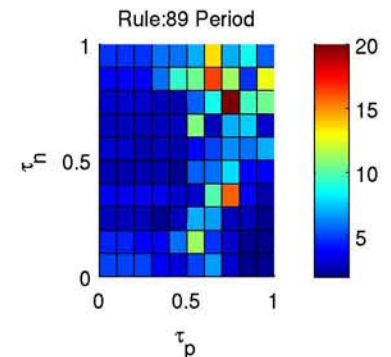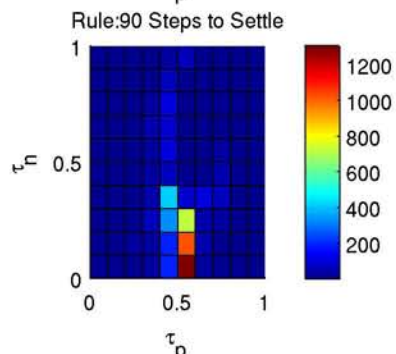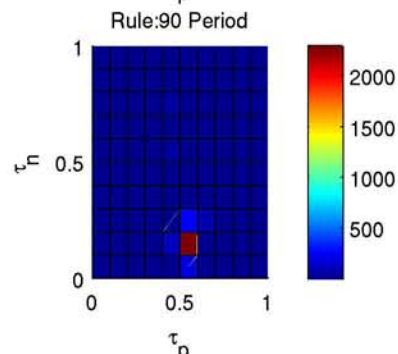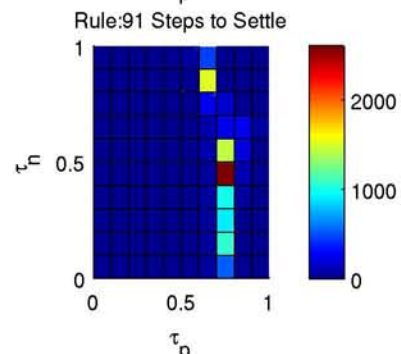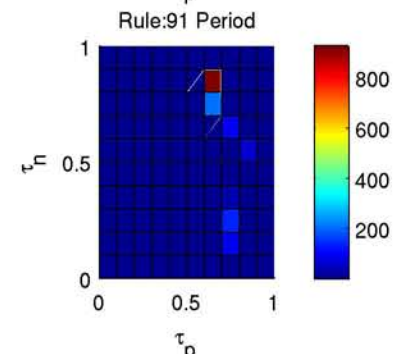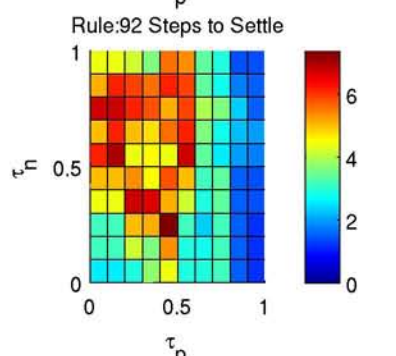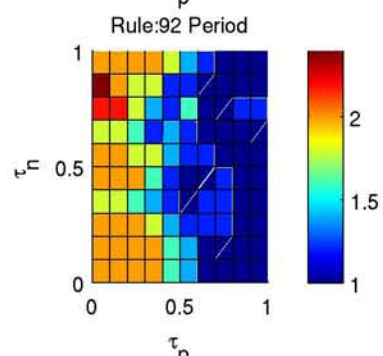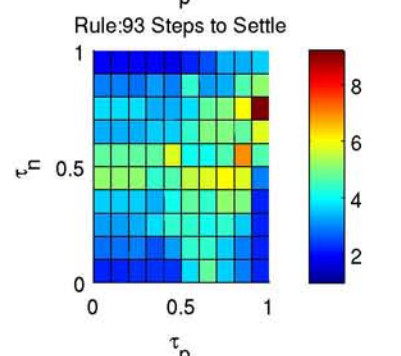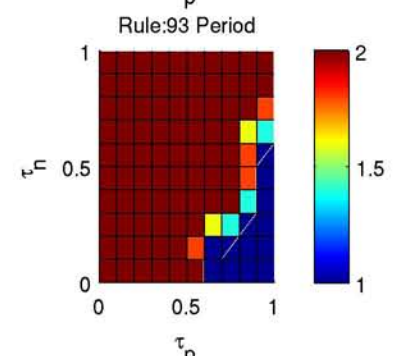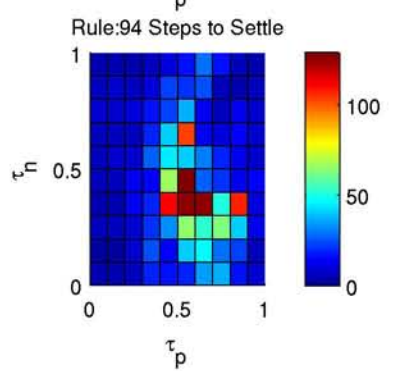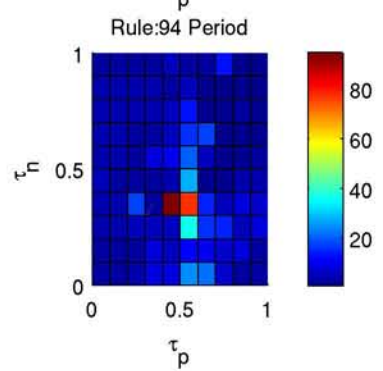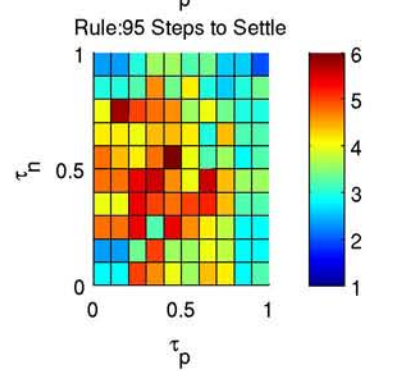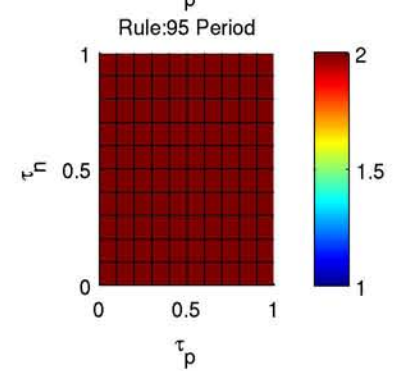

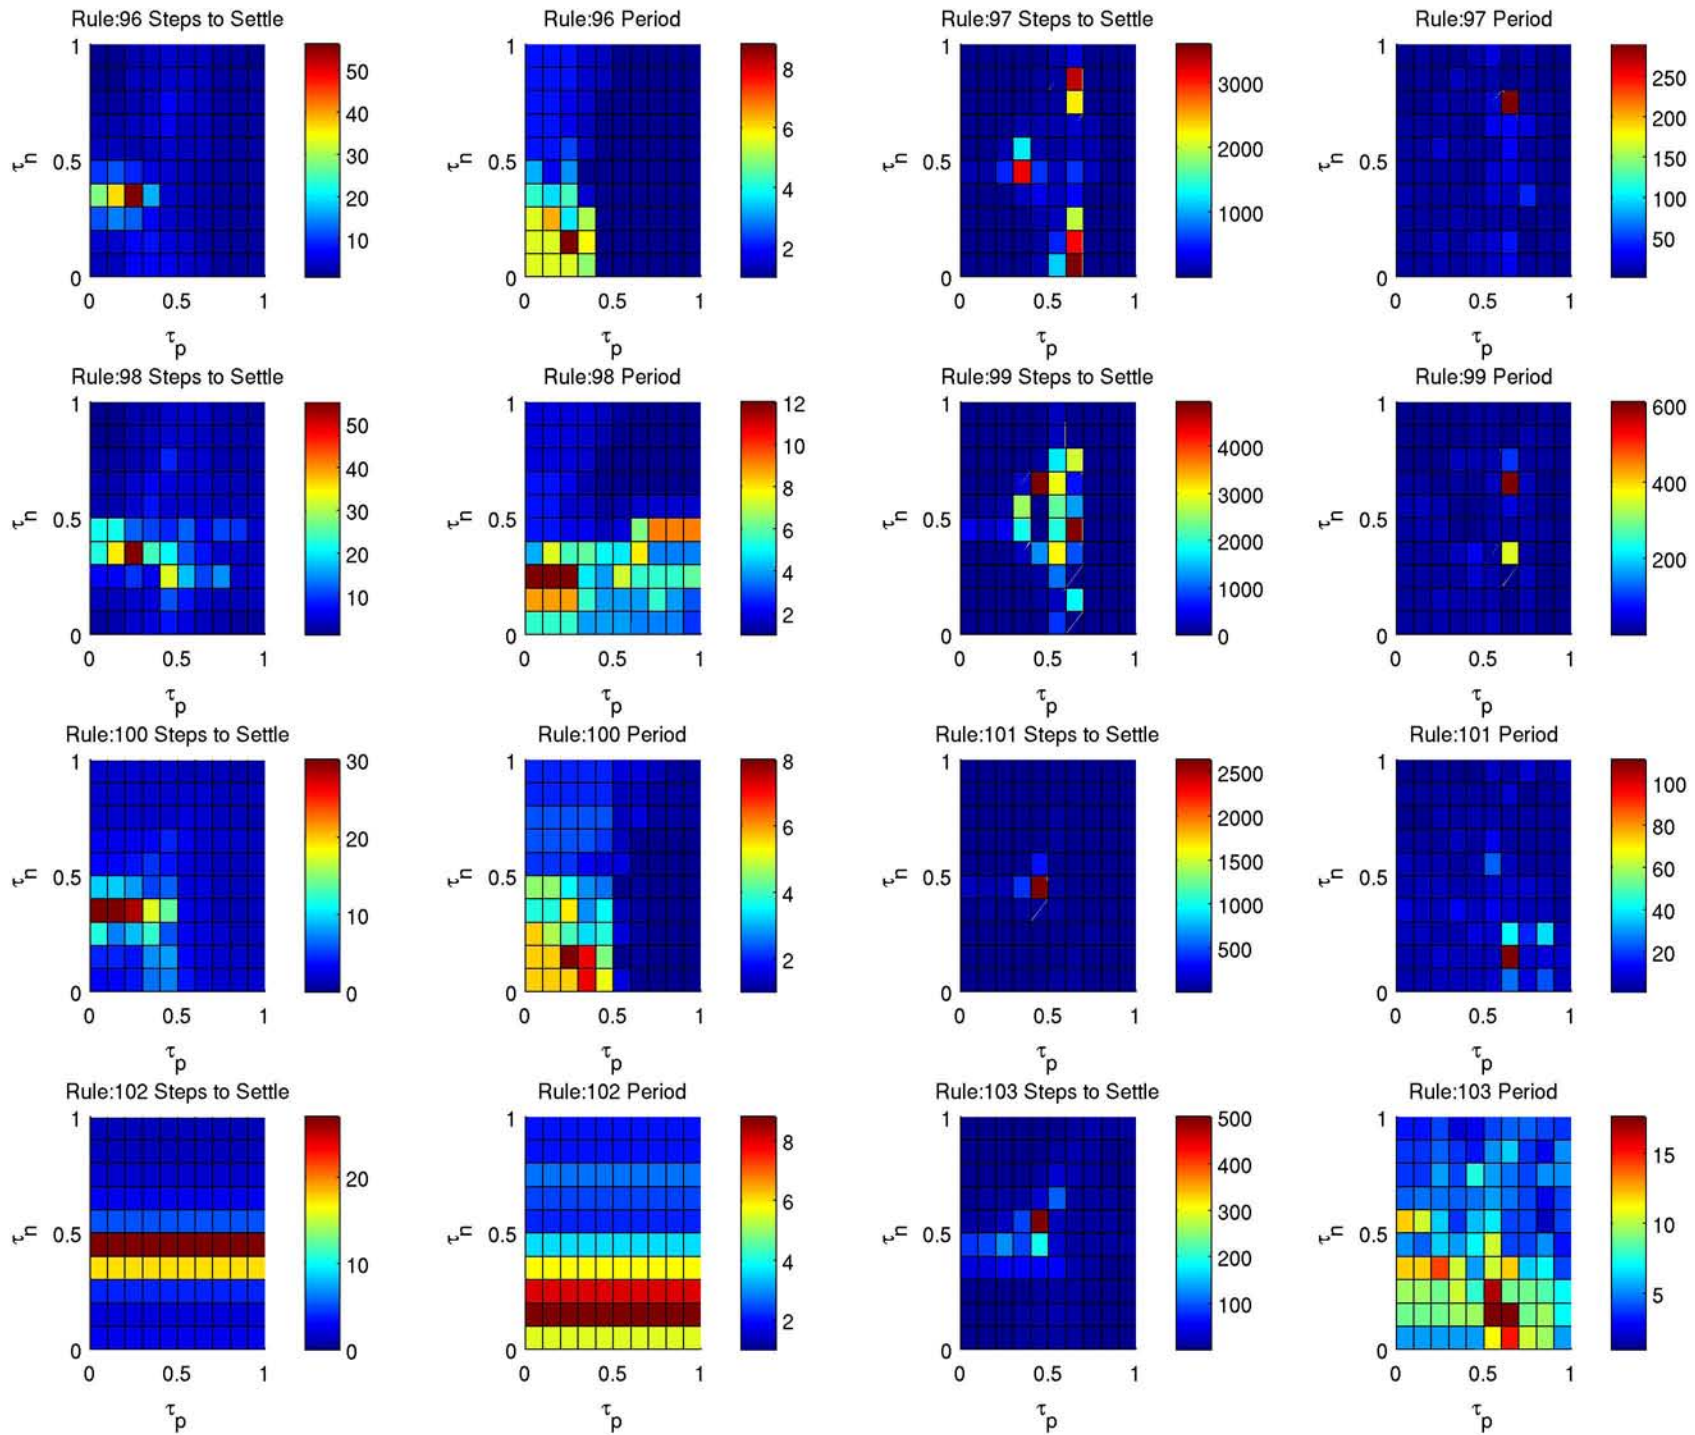

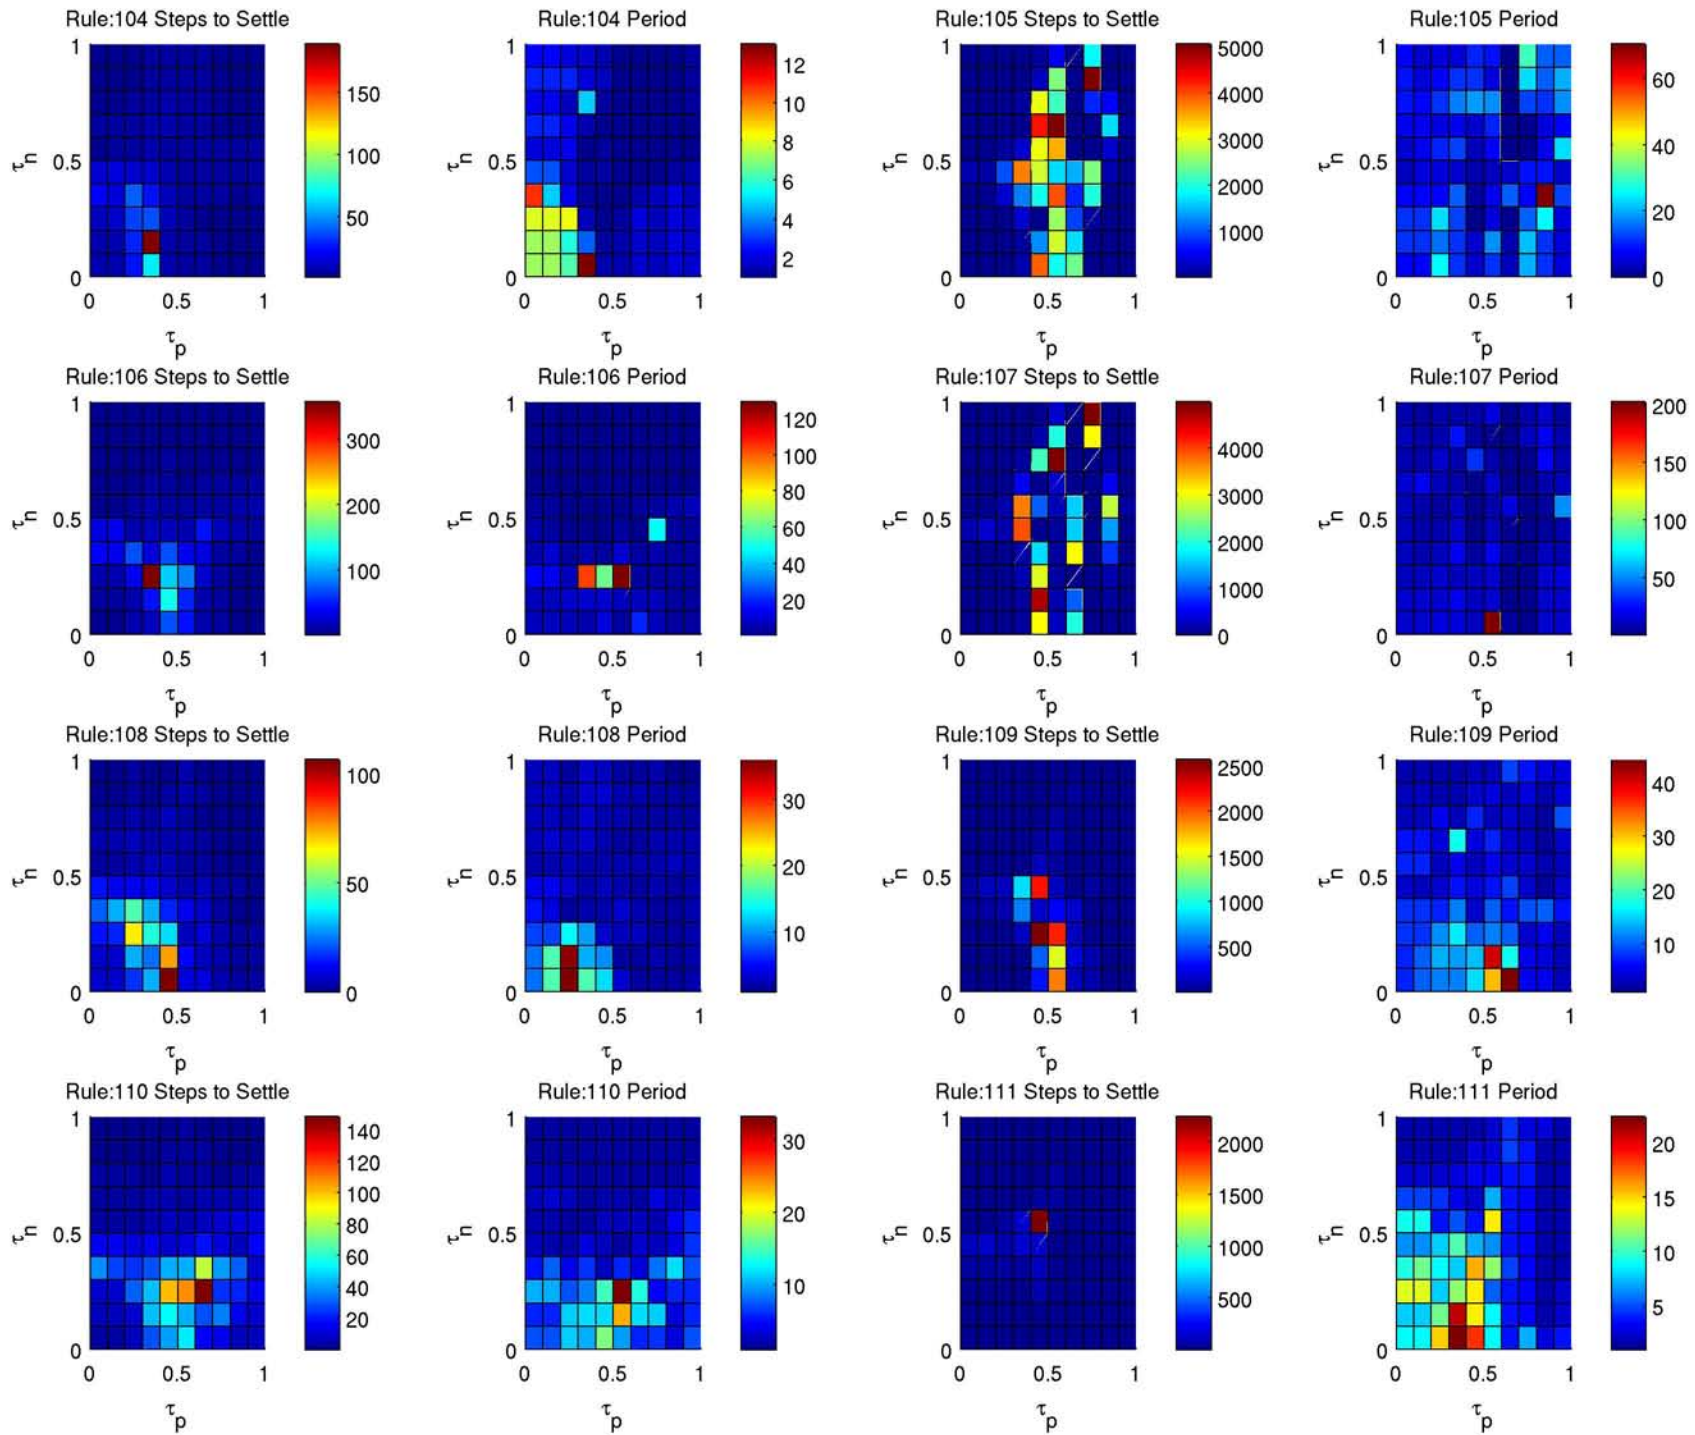

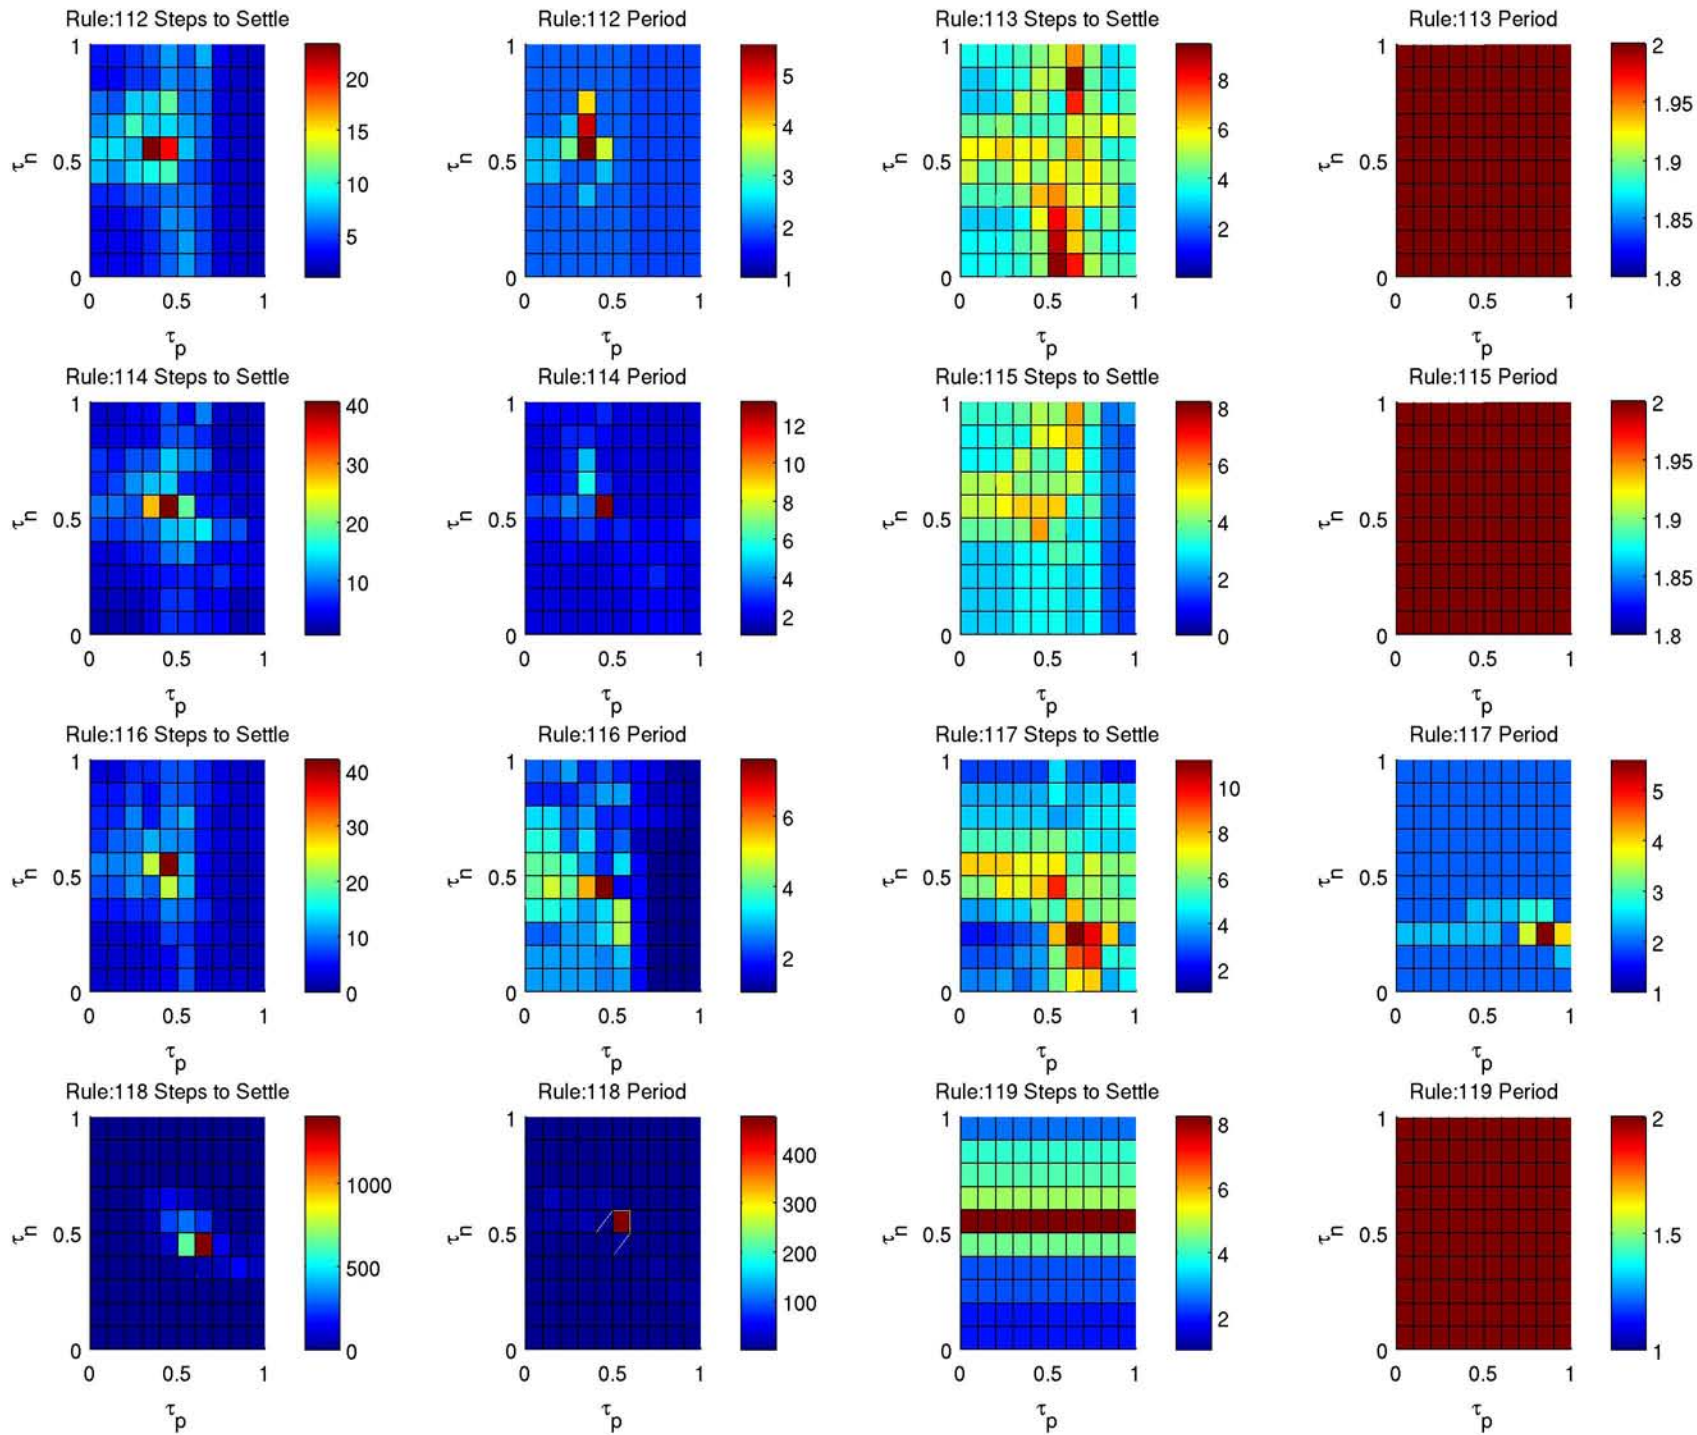



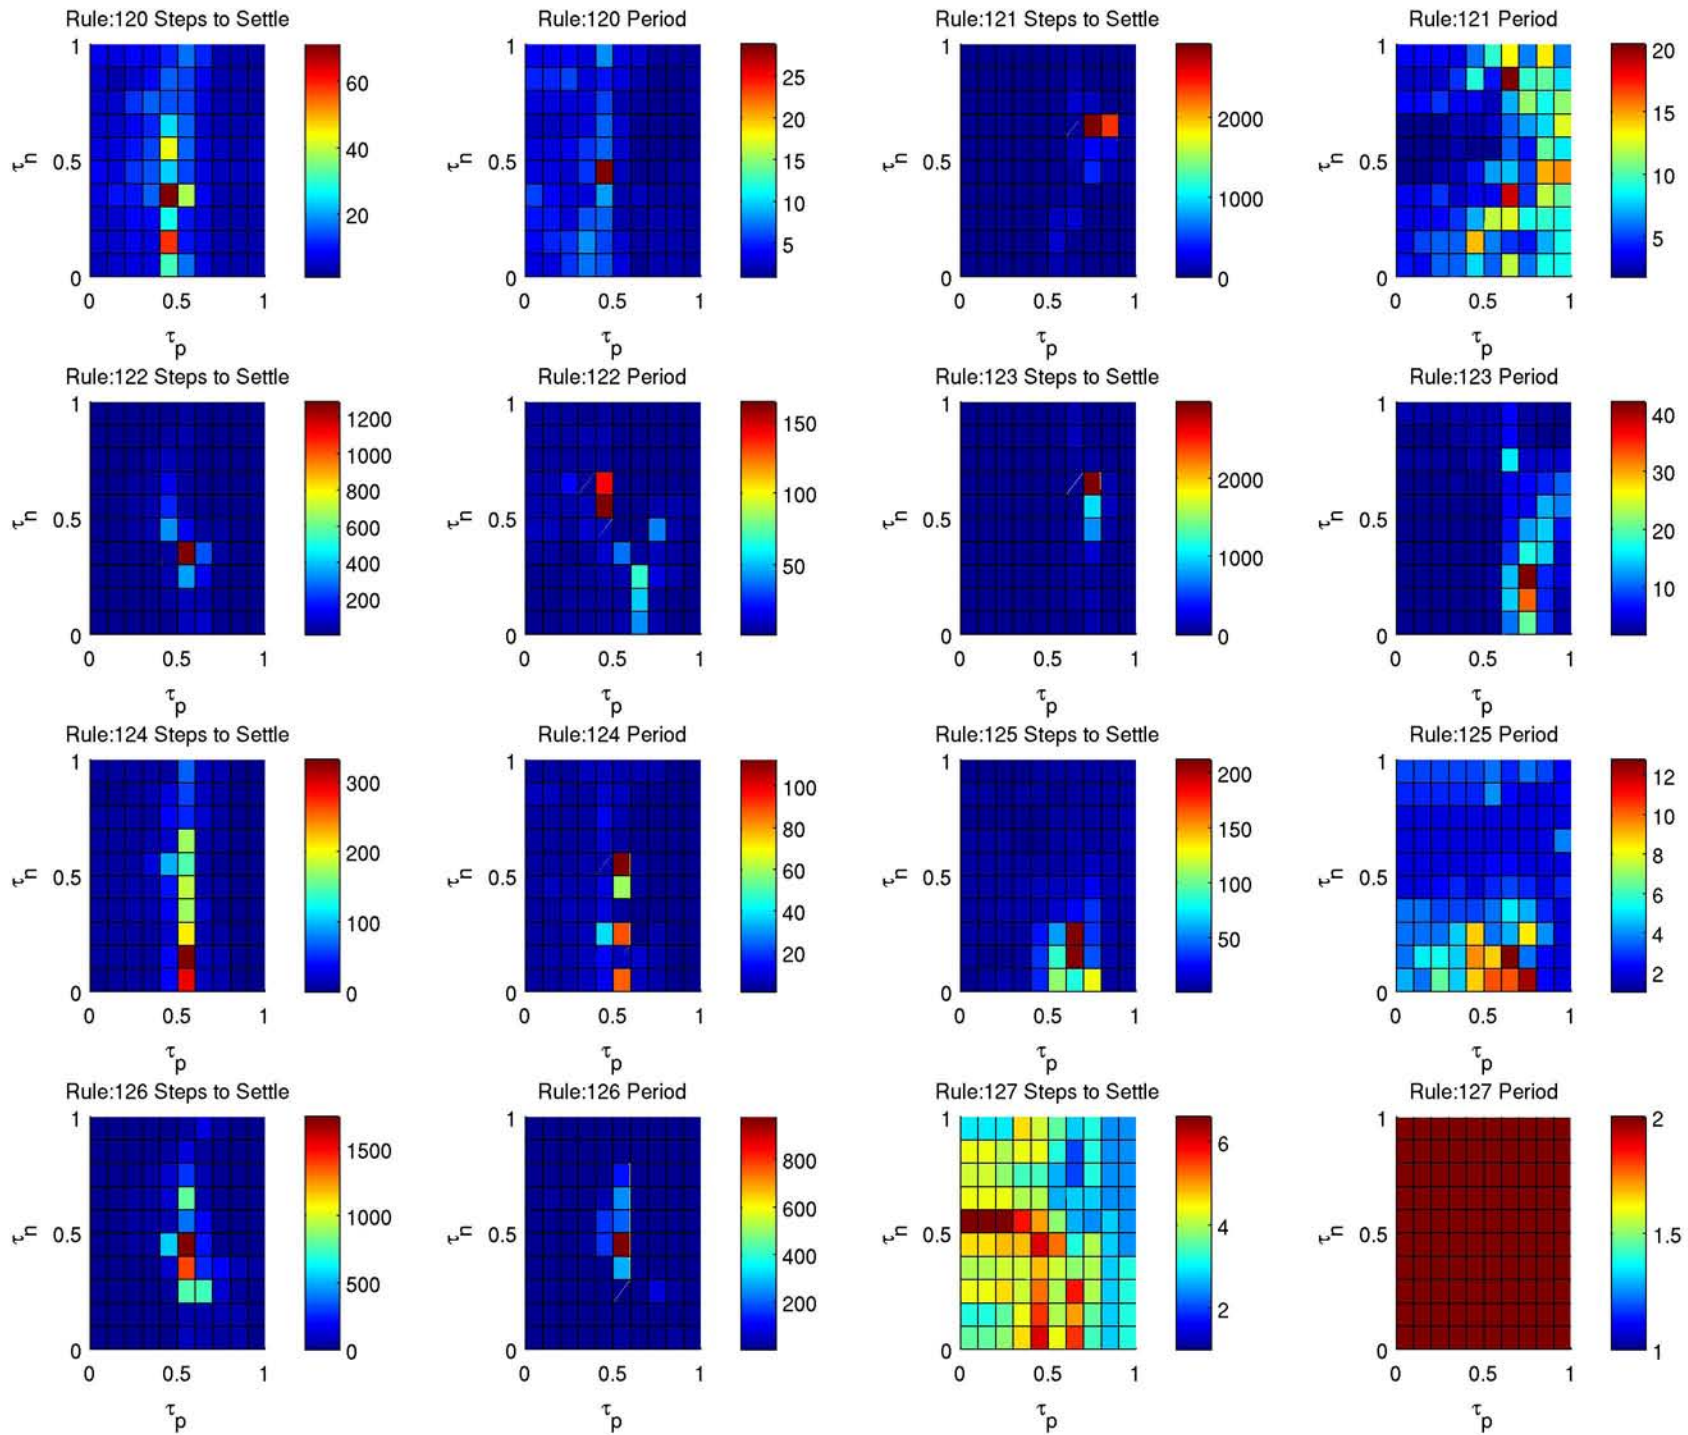

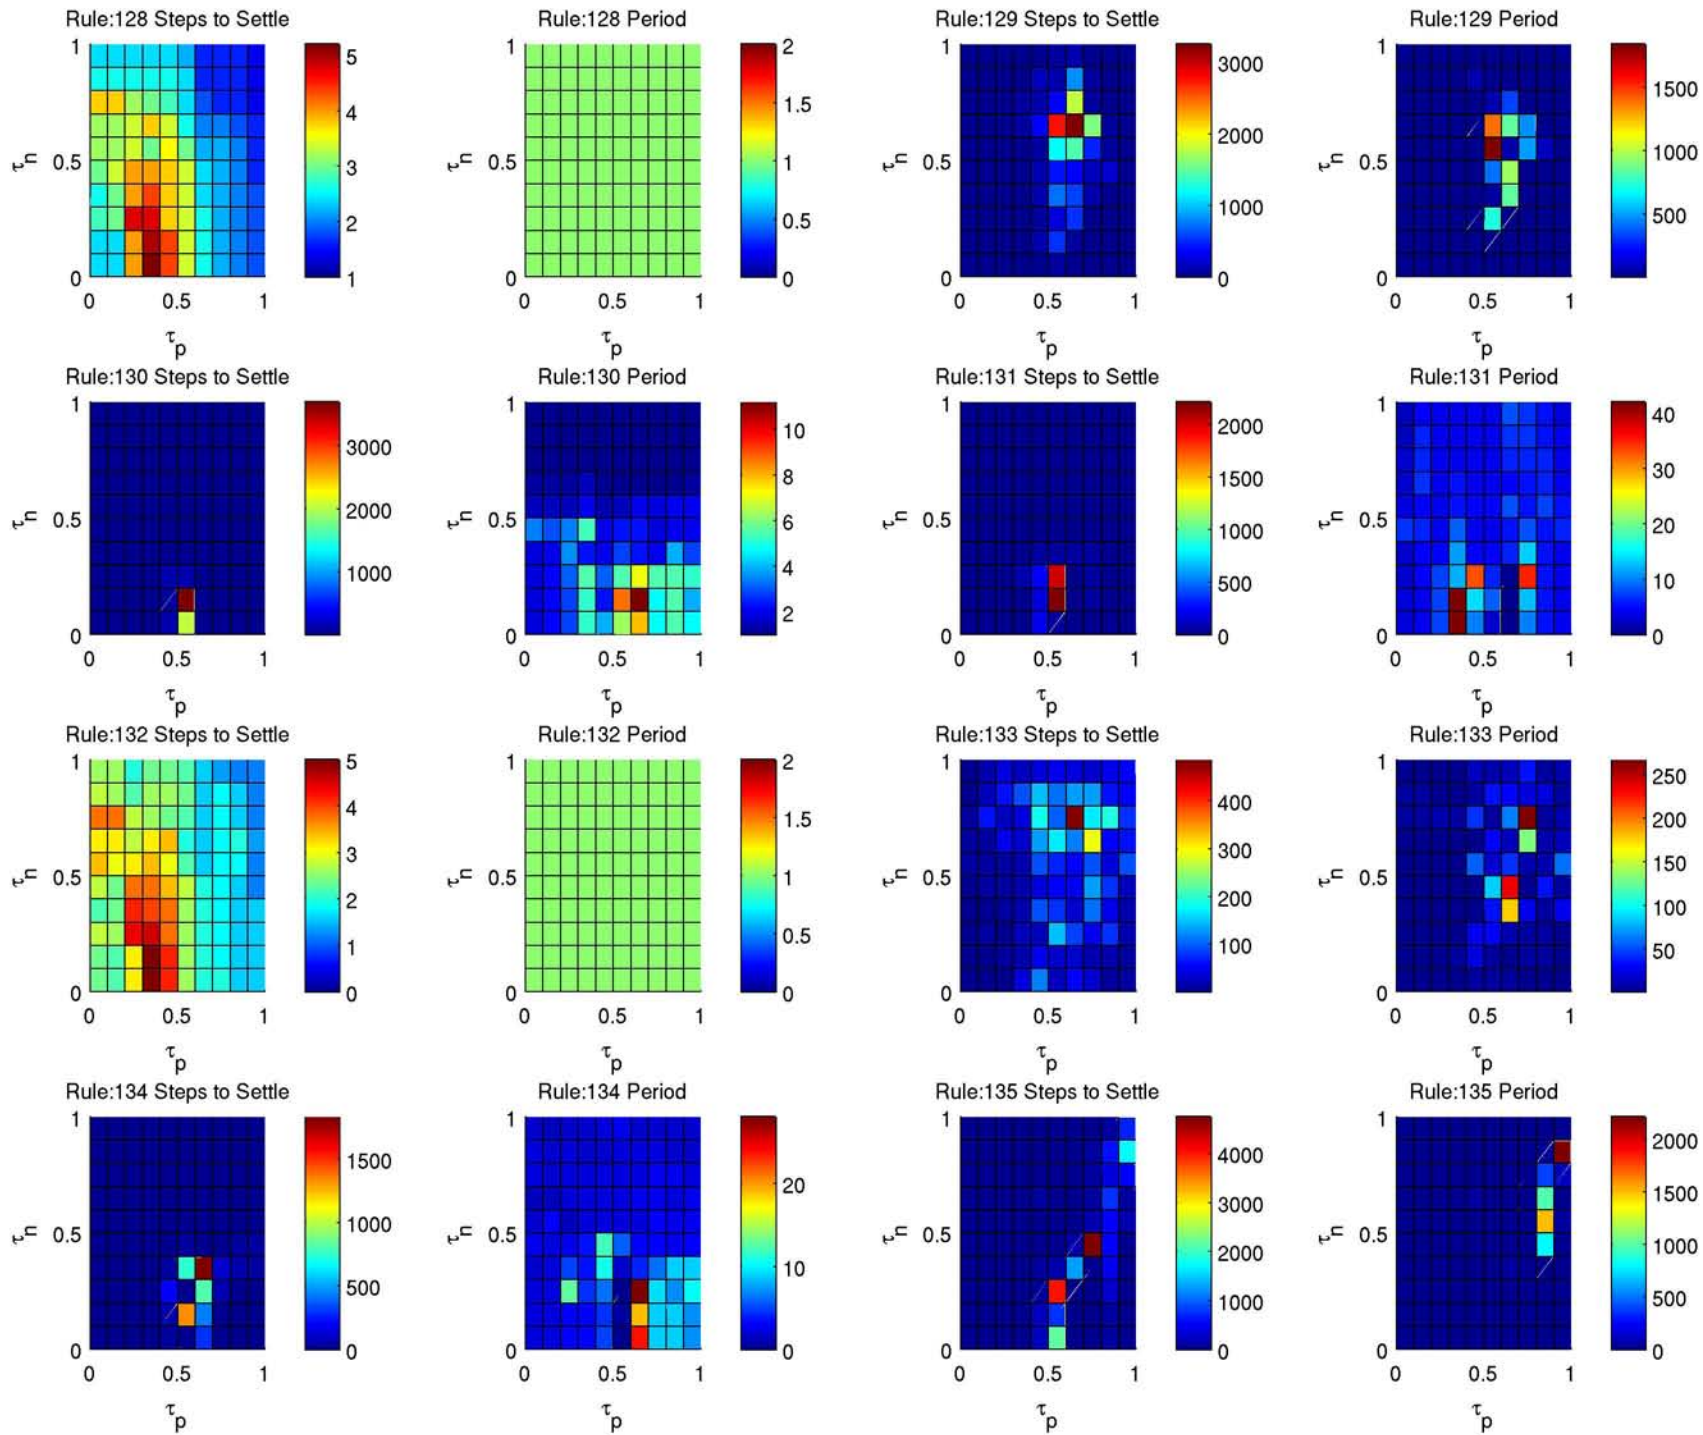

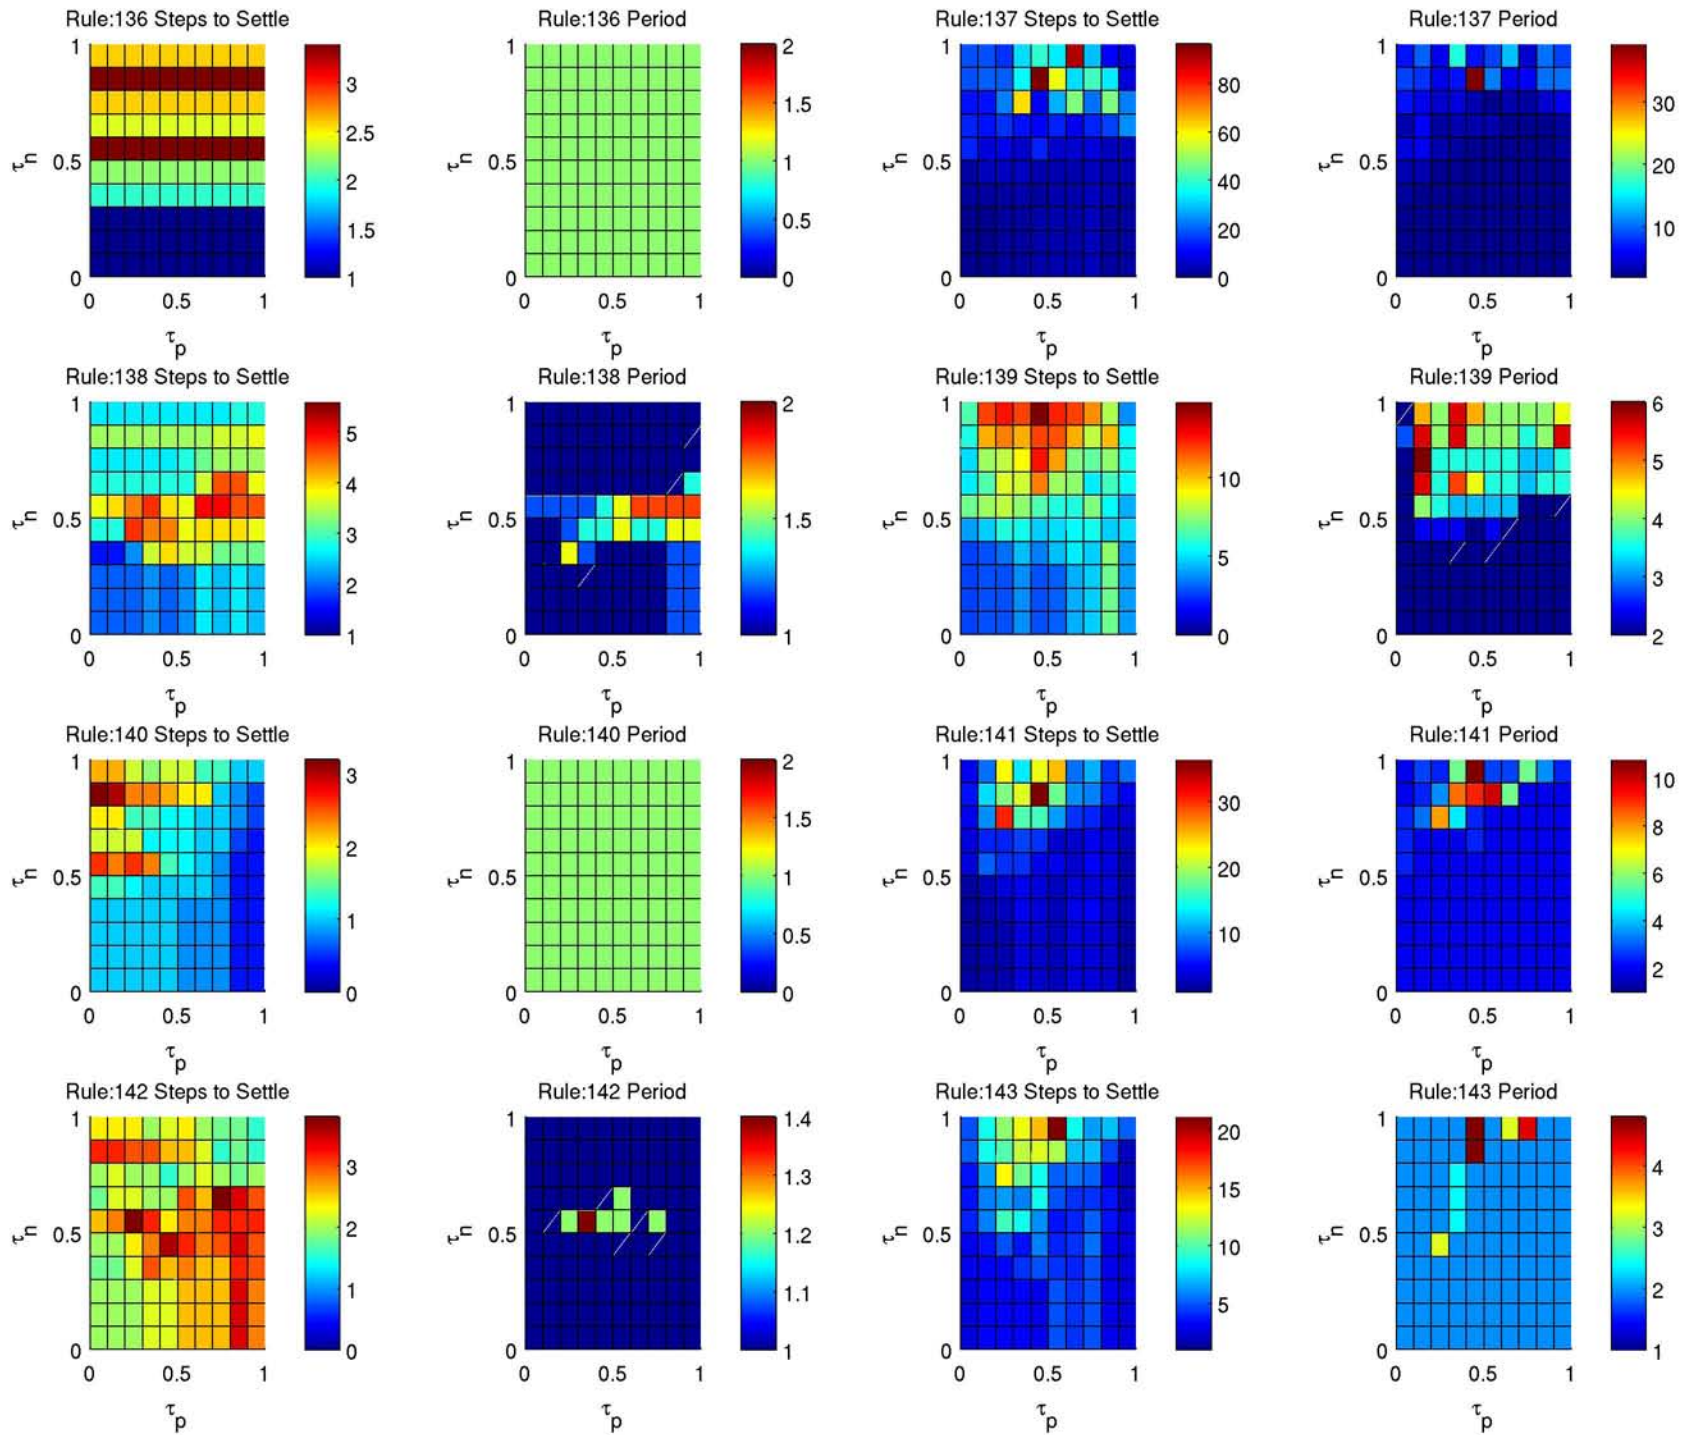

Rule:144 Steps to Settle

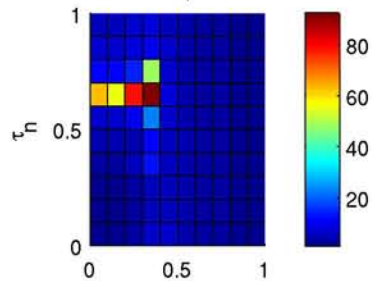

Rule:144 Period

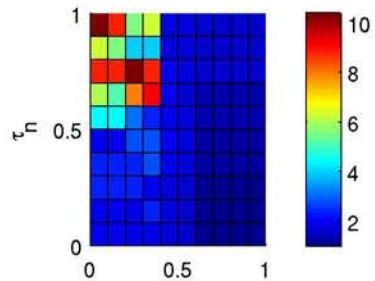

Rule:145 Steps to Settle

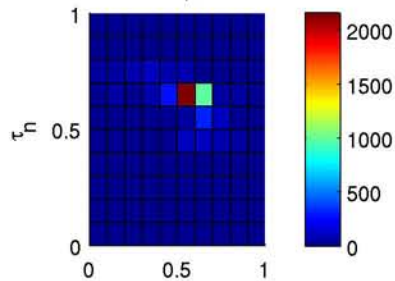

Rule:145 Period

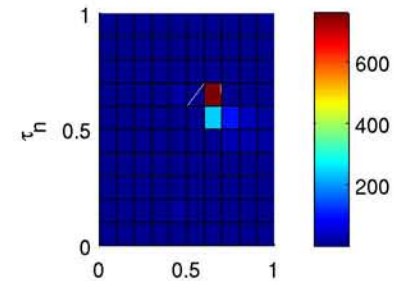

Rule:146 Steps to Settle

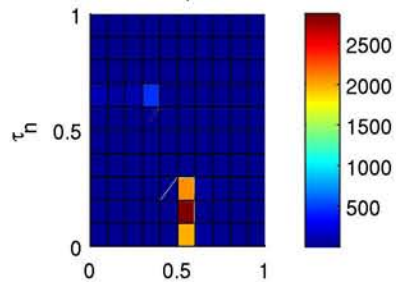

Rule:146 Period

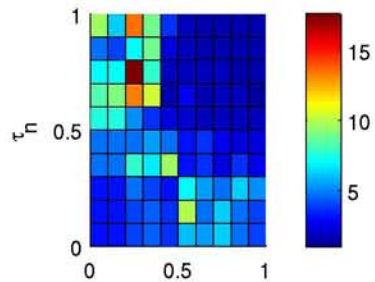

Rule:147 Steps to Settle

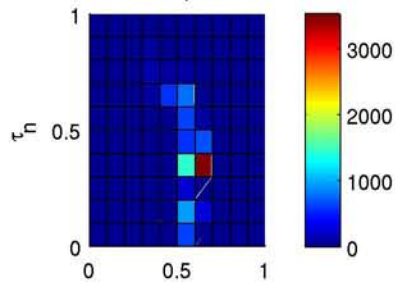

Rule:147 Period

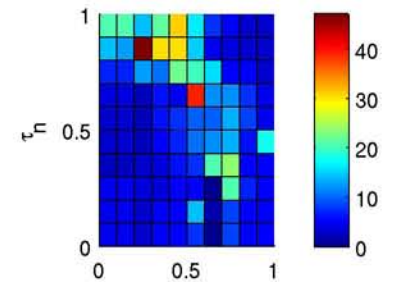

Rule:148 Steps to Settle

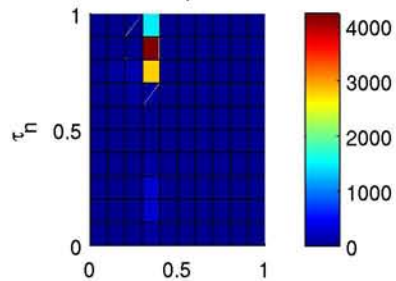

Rule:148 Period

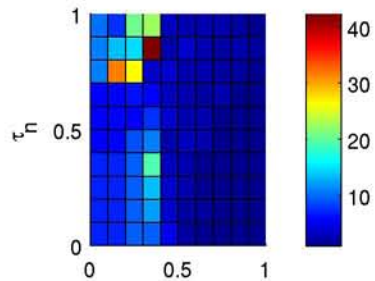

Rule:149 Steps to Settle

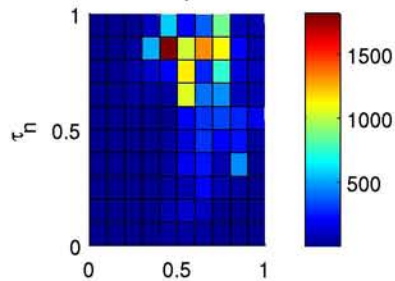

Rule:149 Period

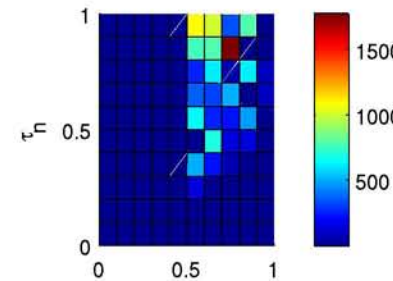

Rule:150 Steps to Settle

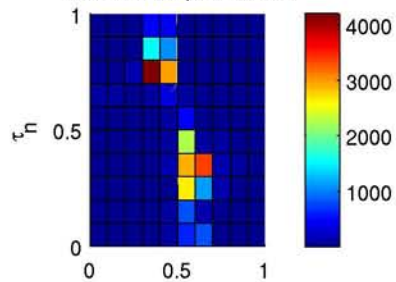

Rule:150 Period

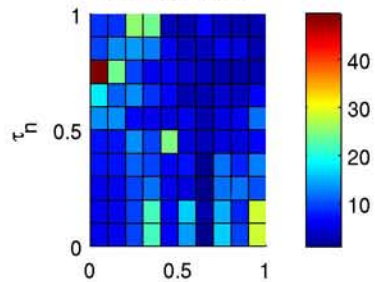

Rule:151 Steps to Settle

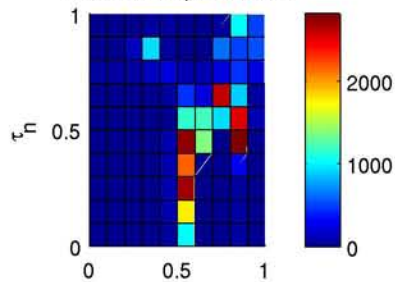

Rule:151 Period

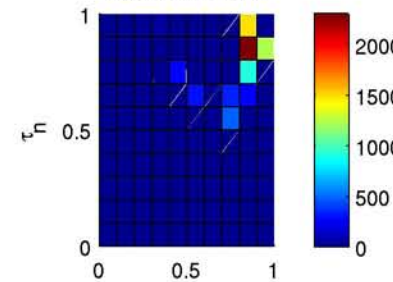

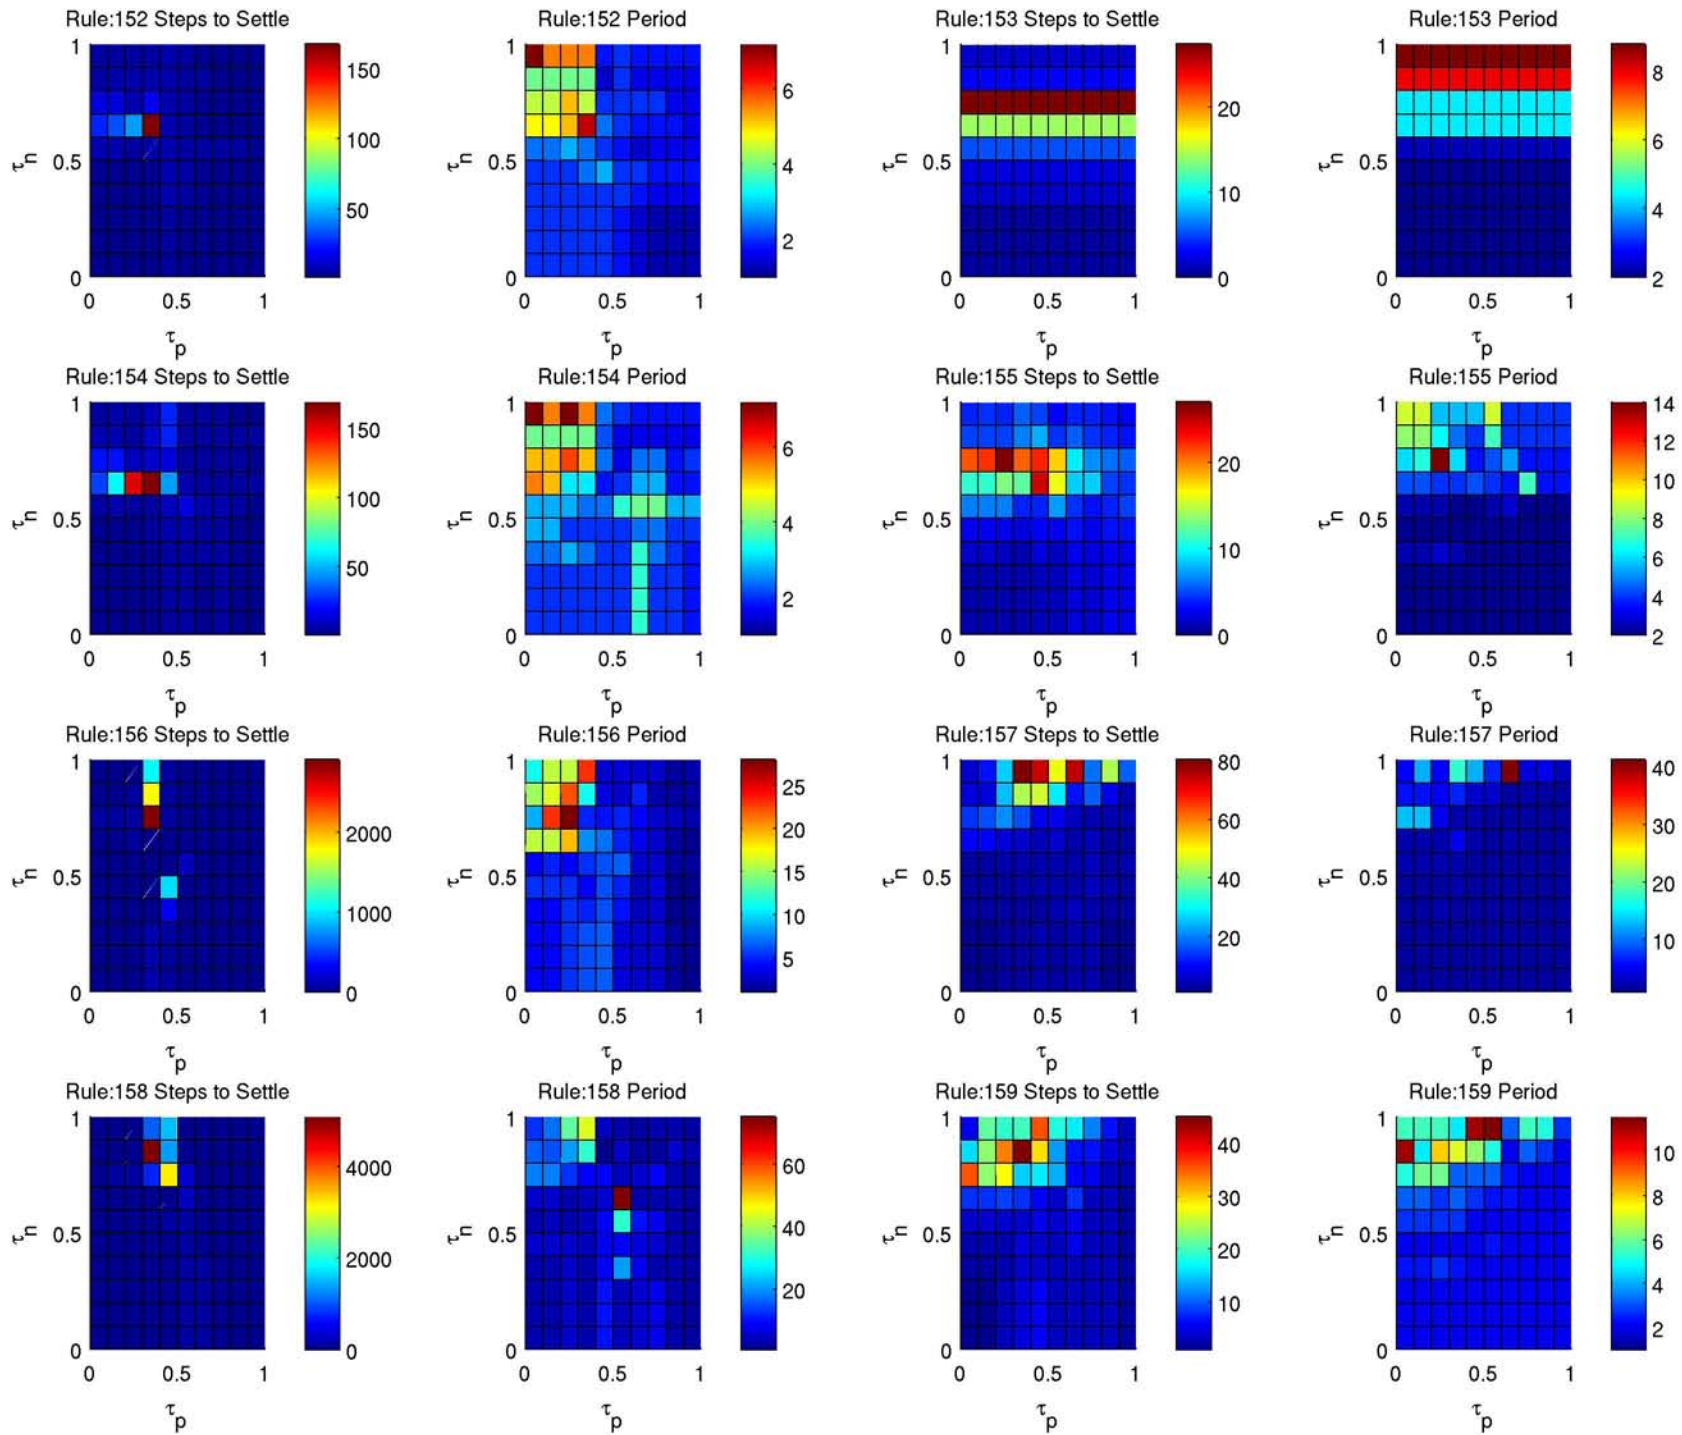

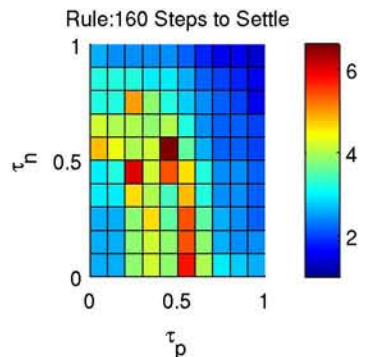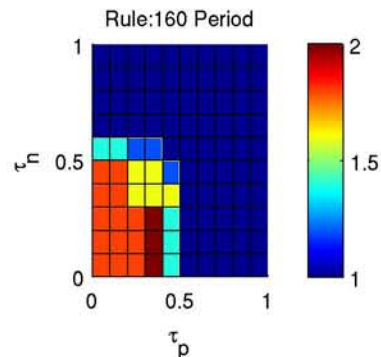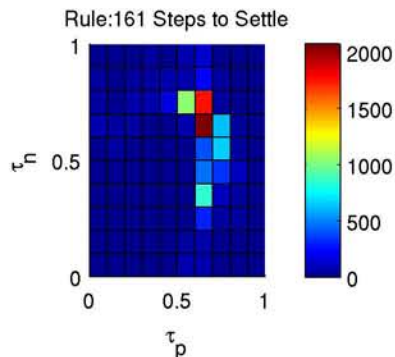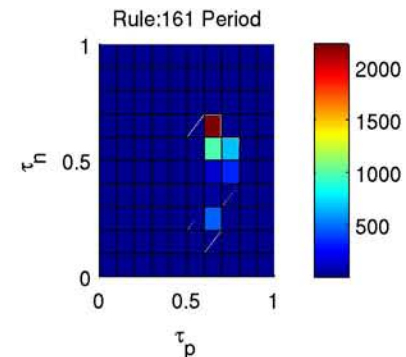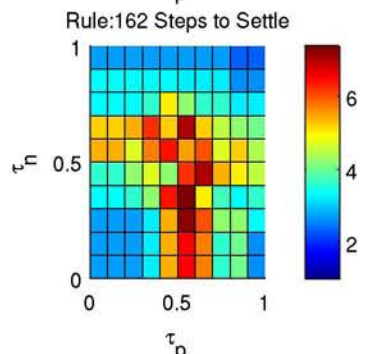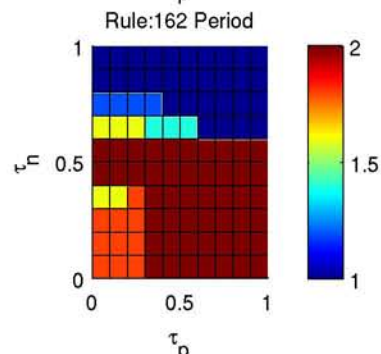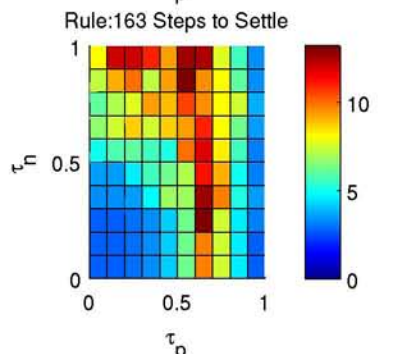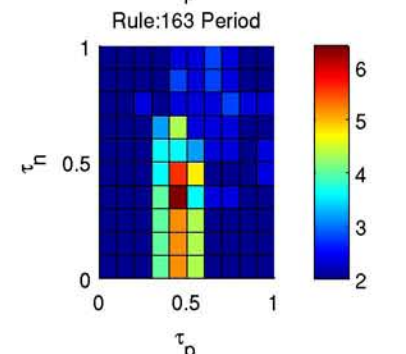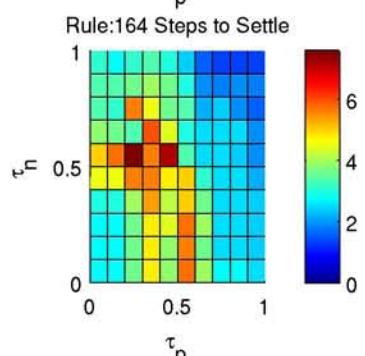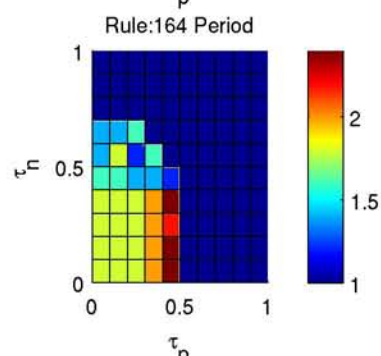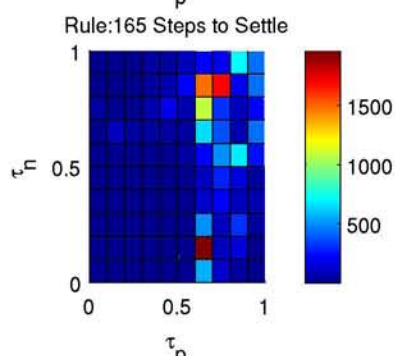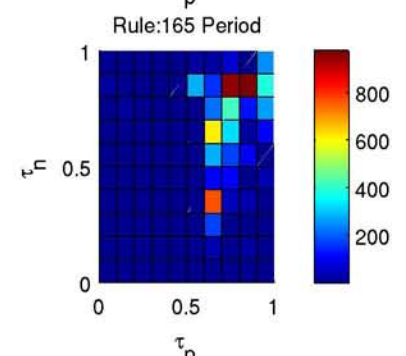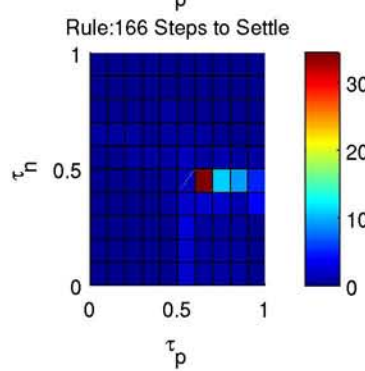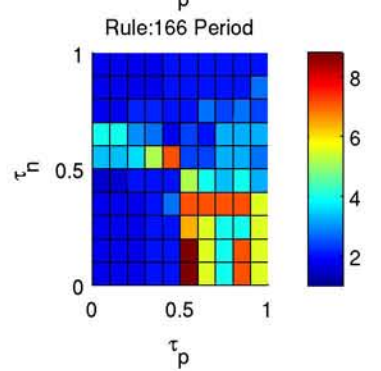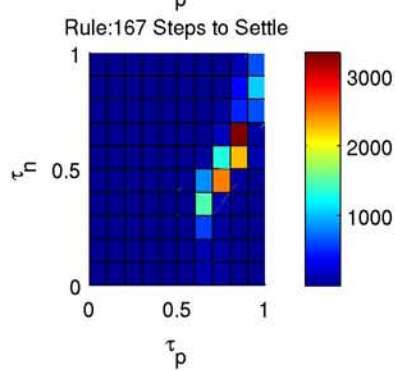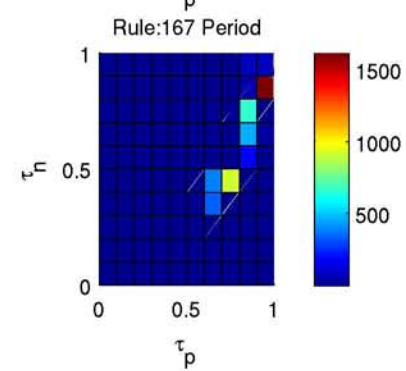

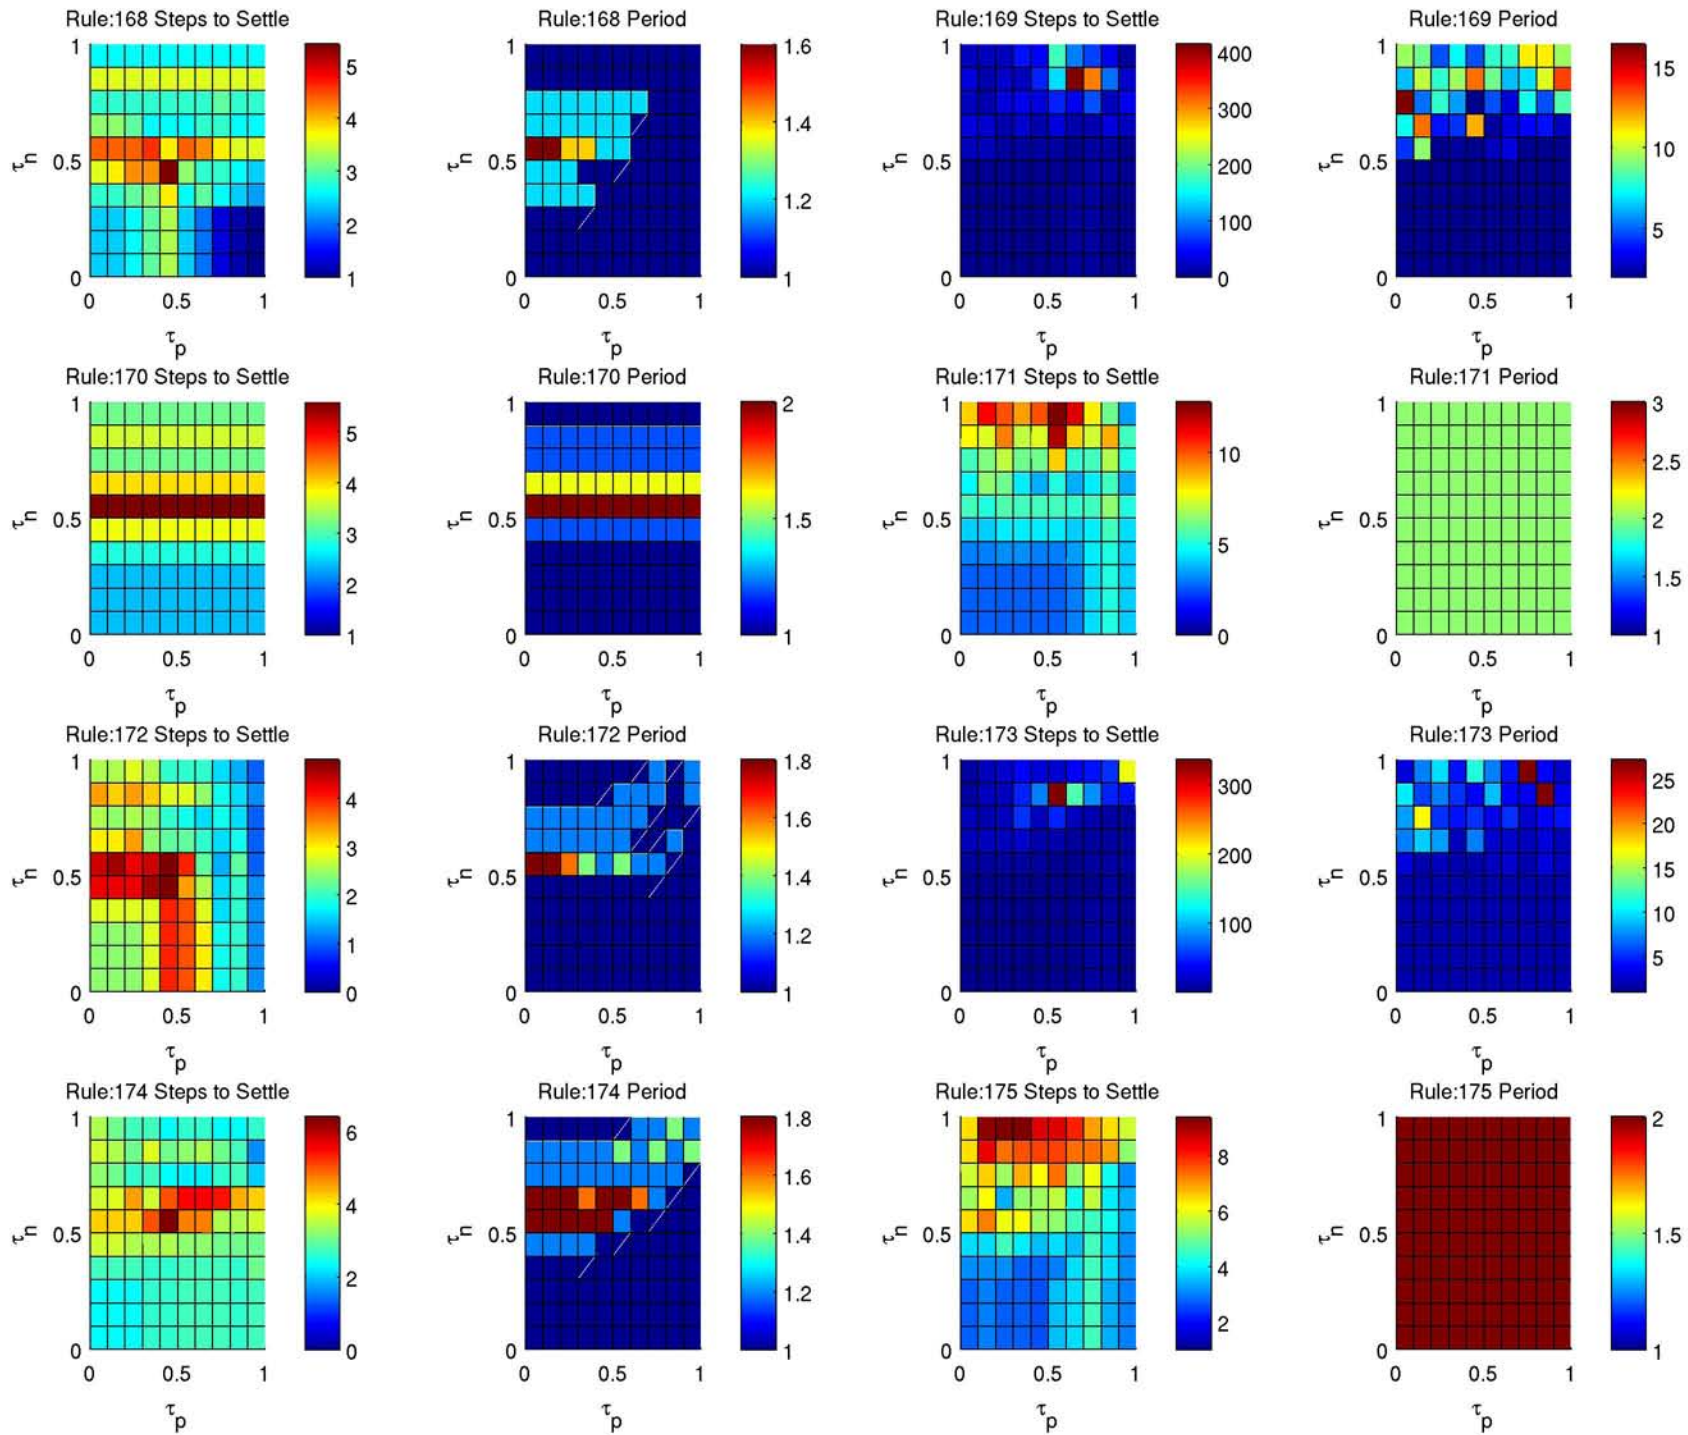

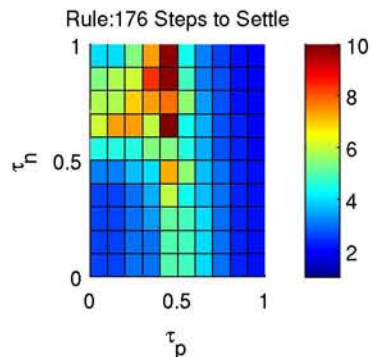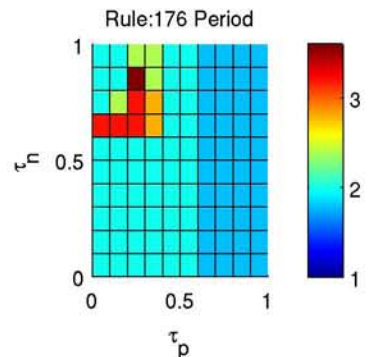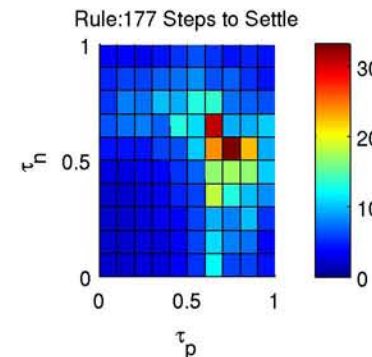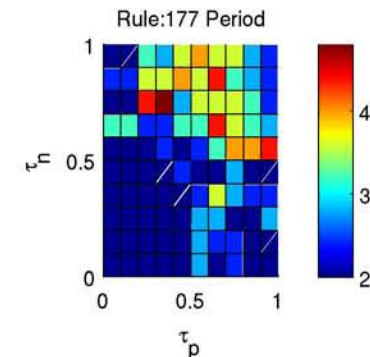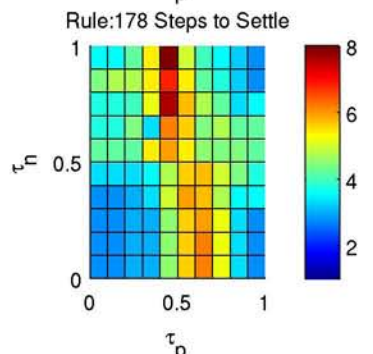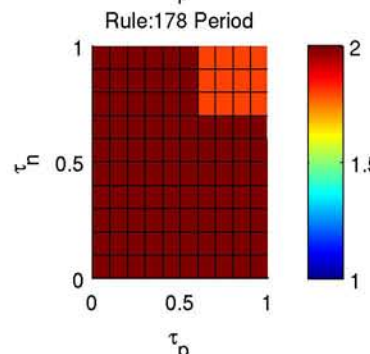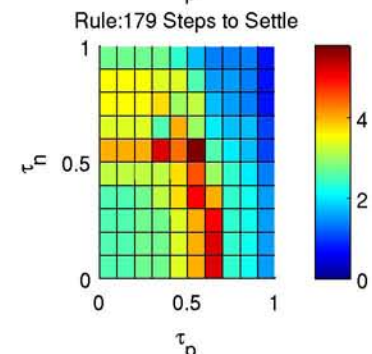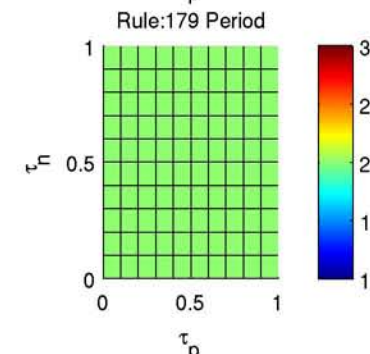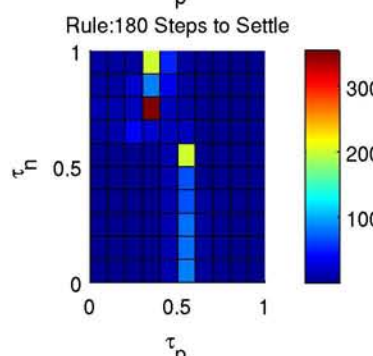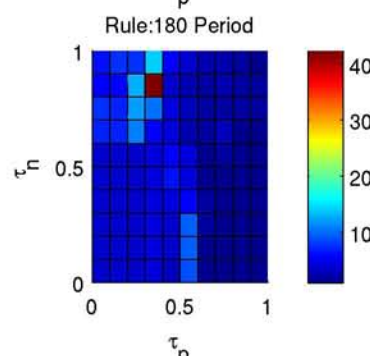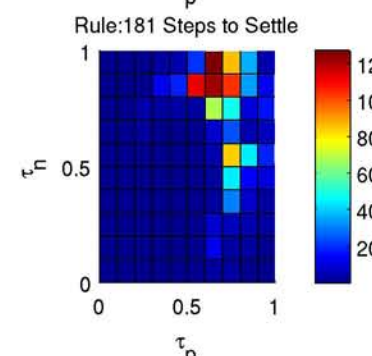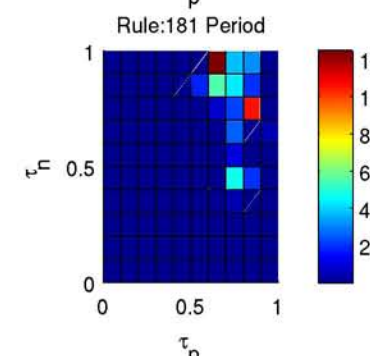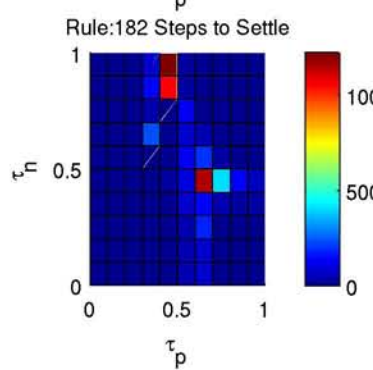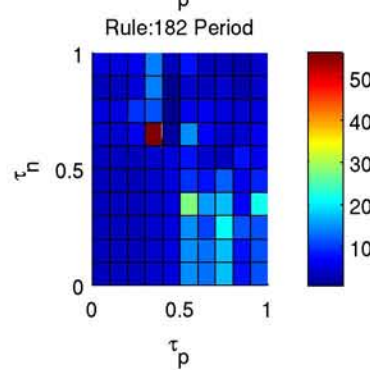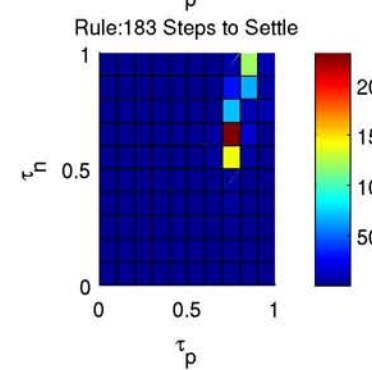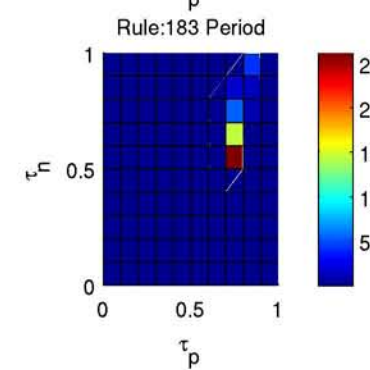



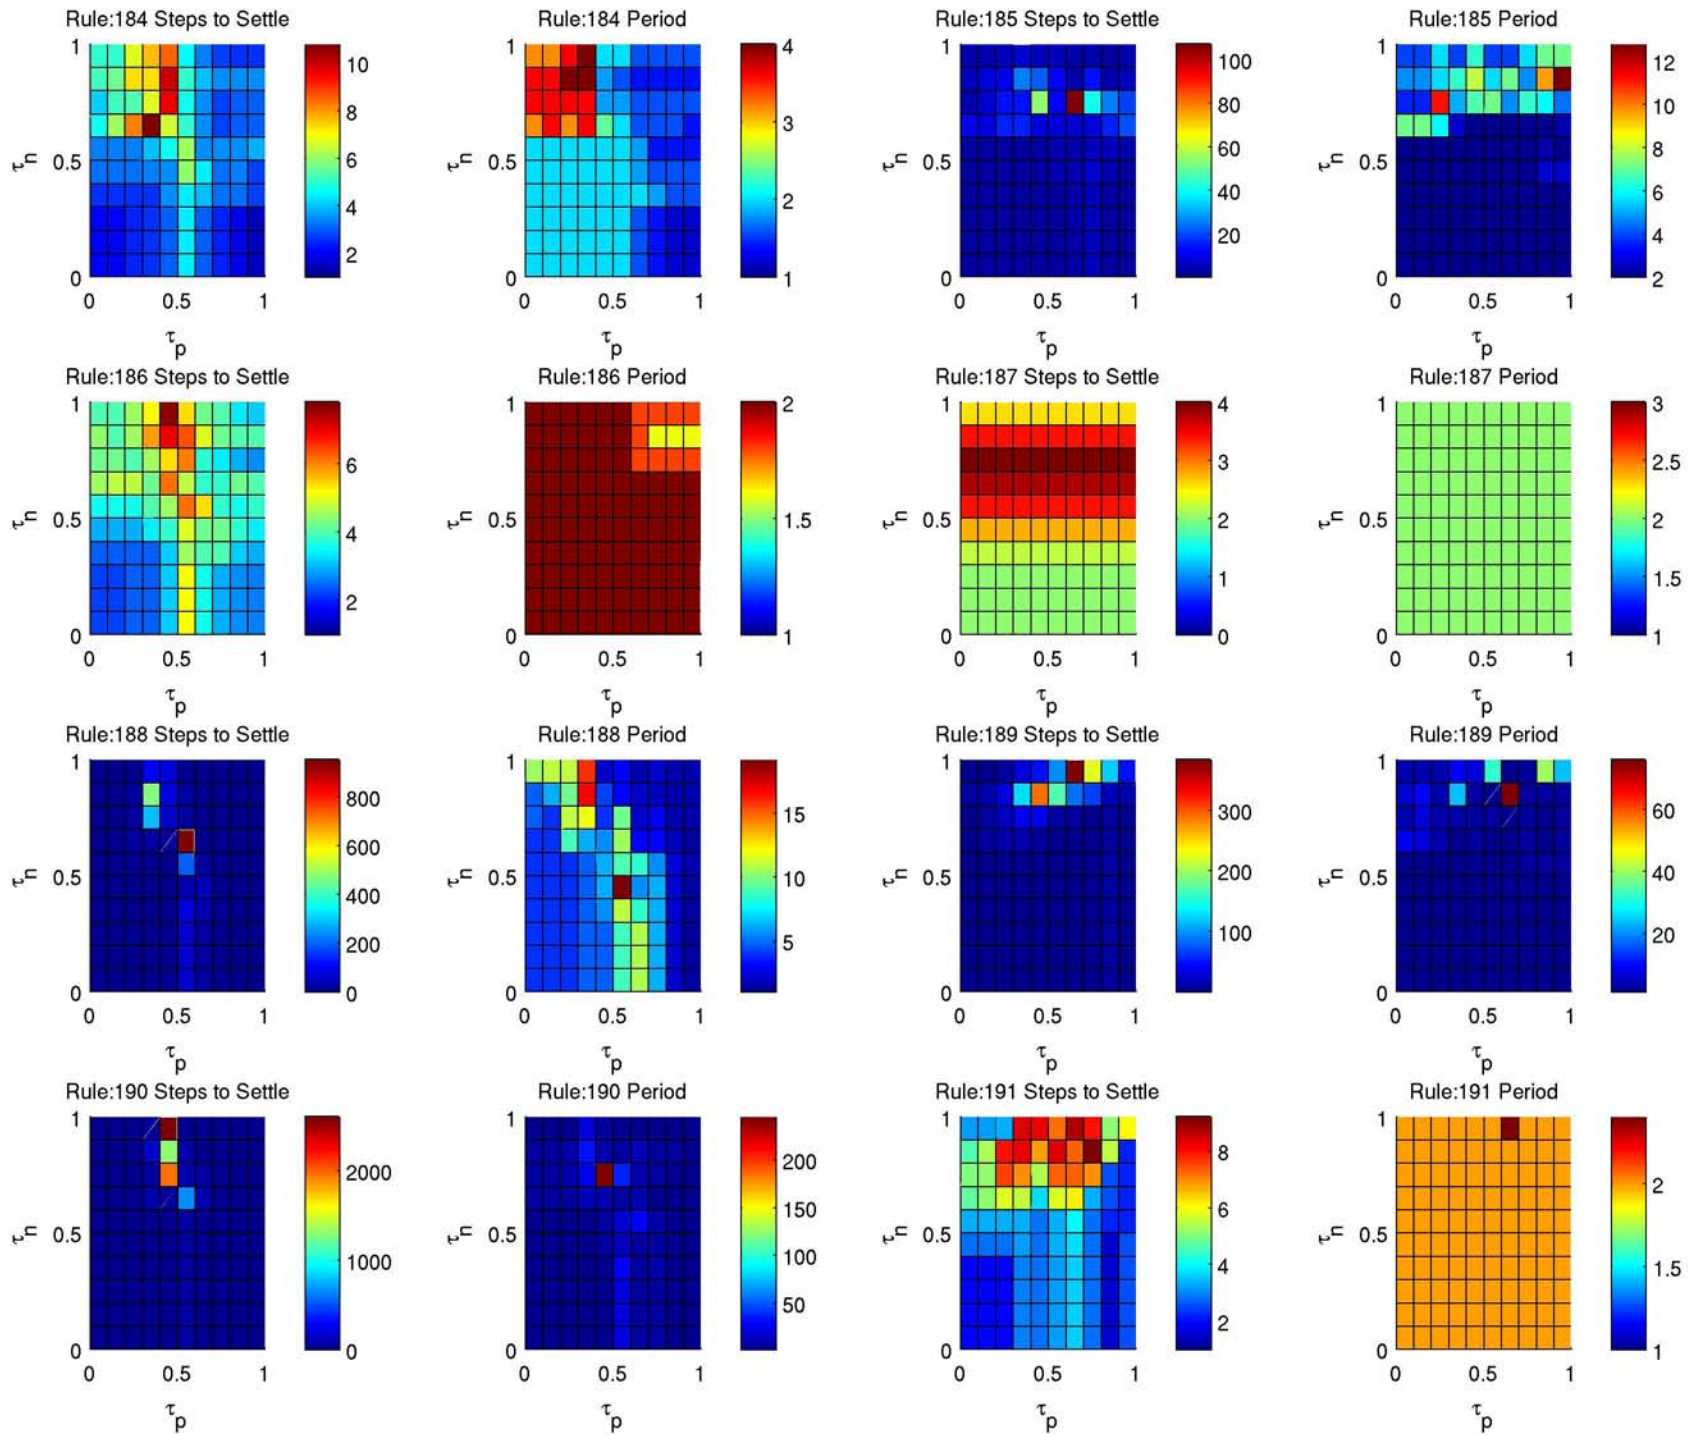

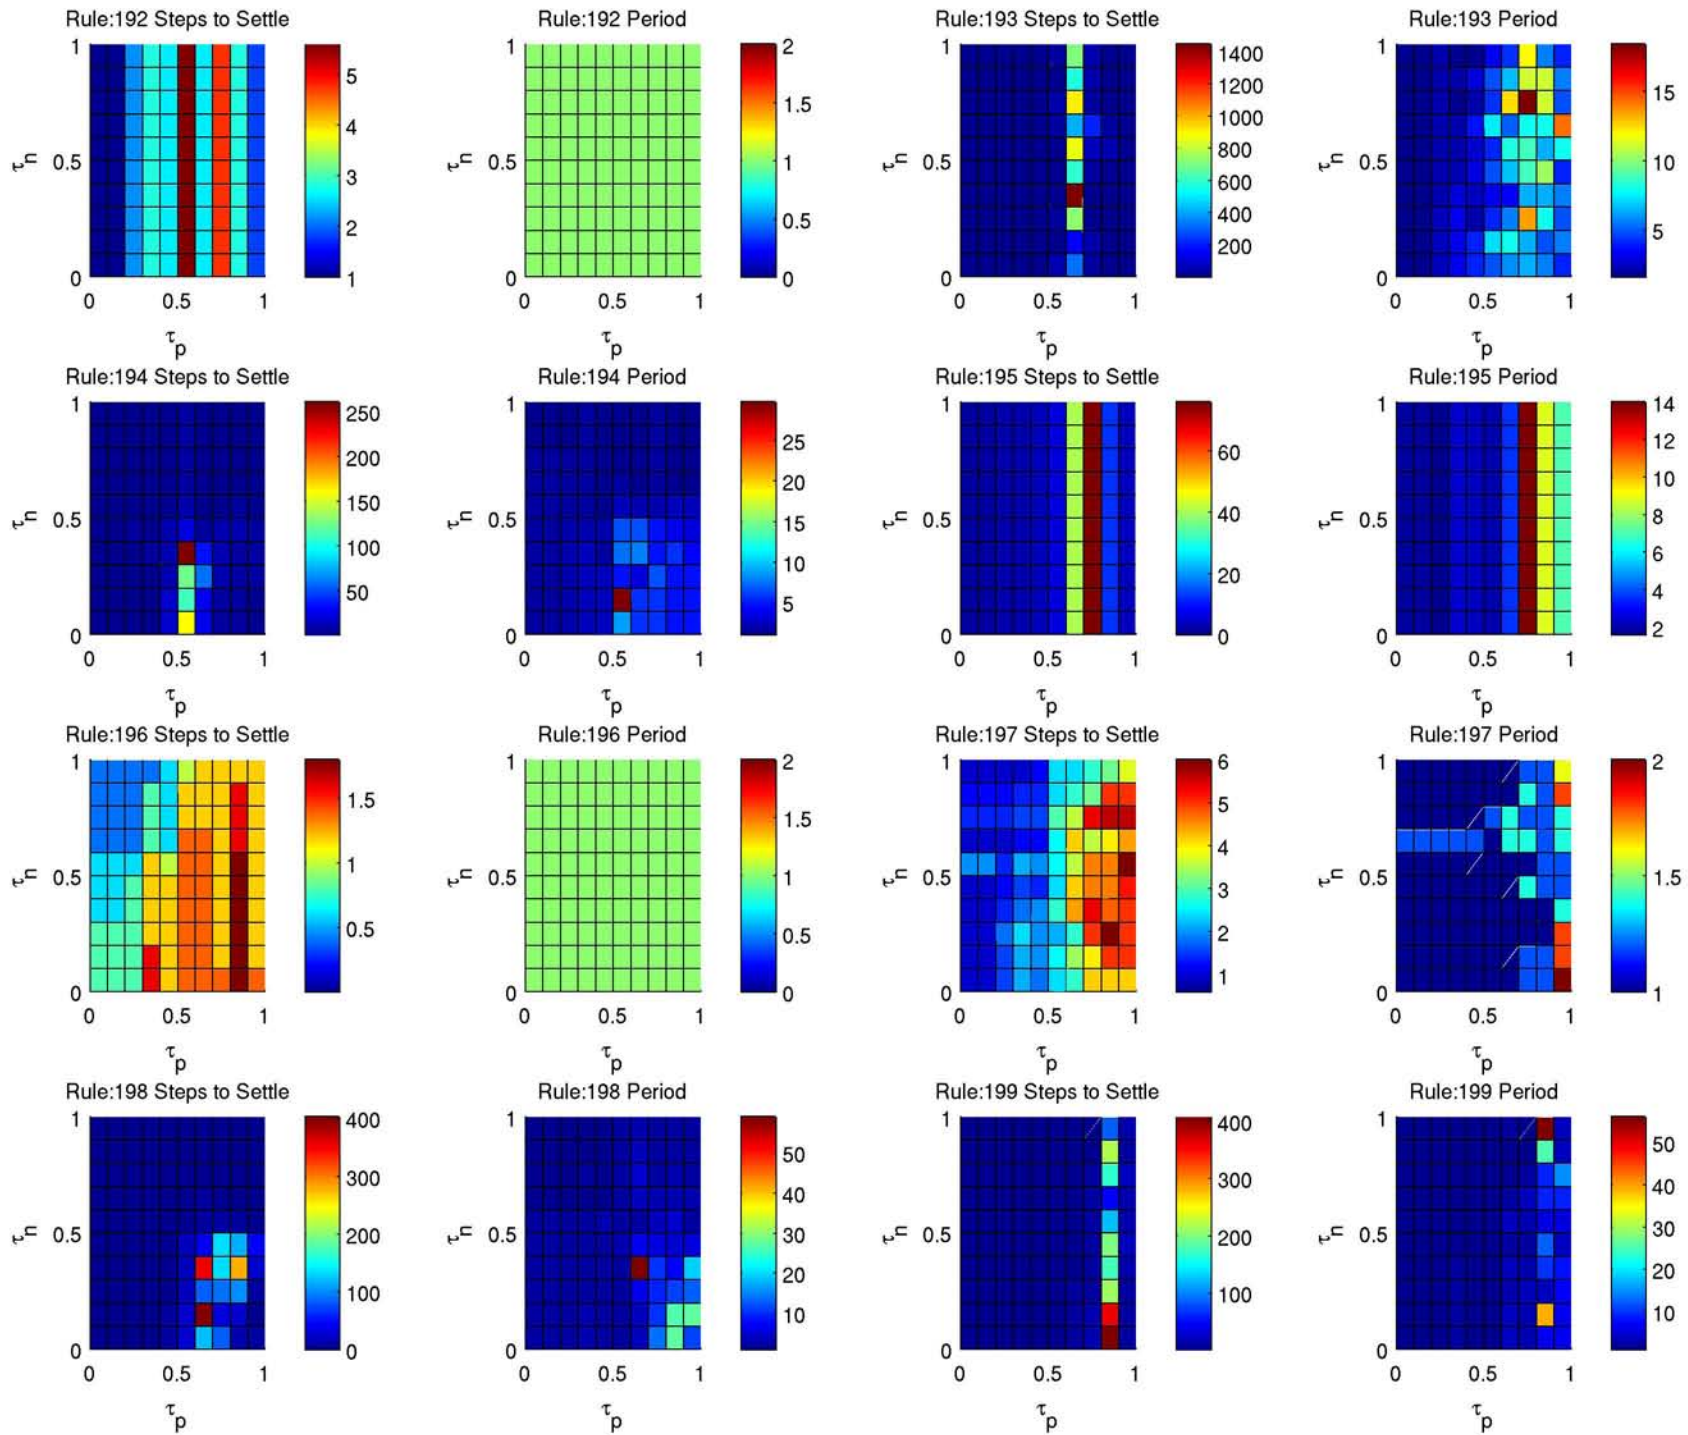

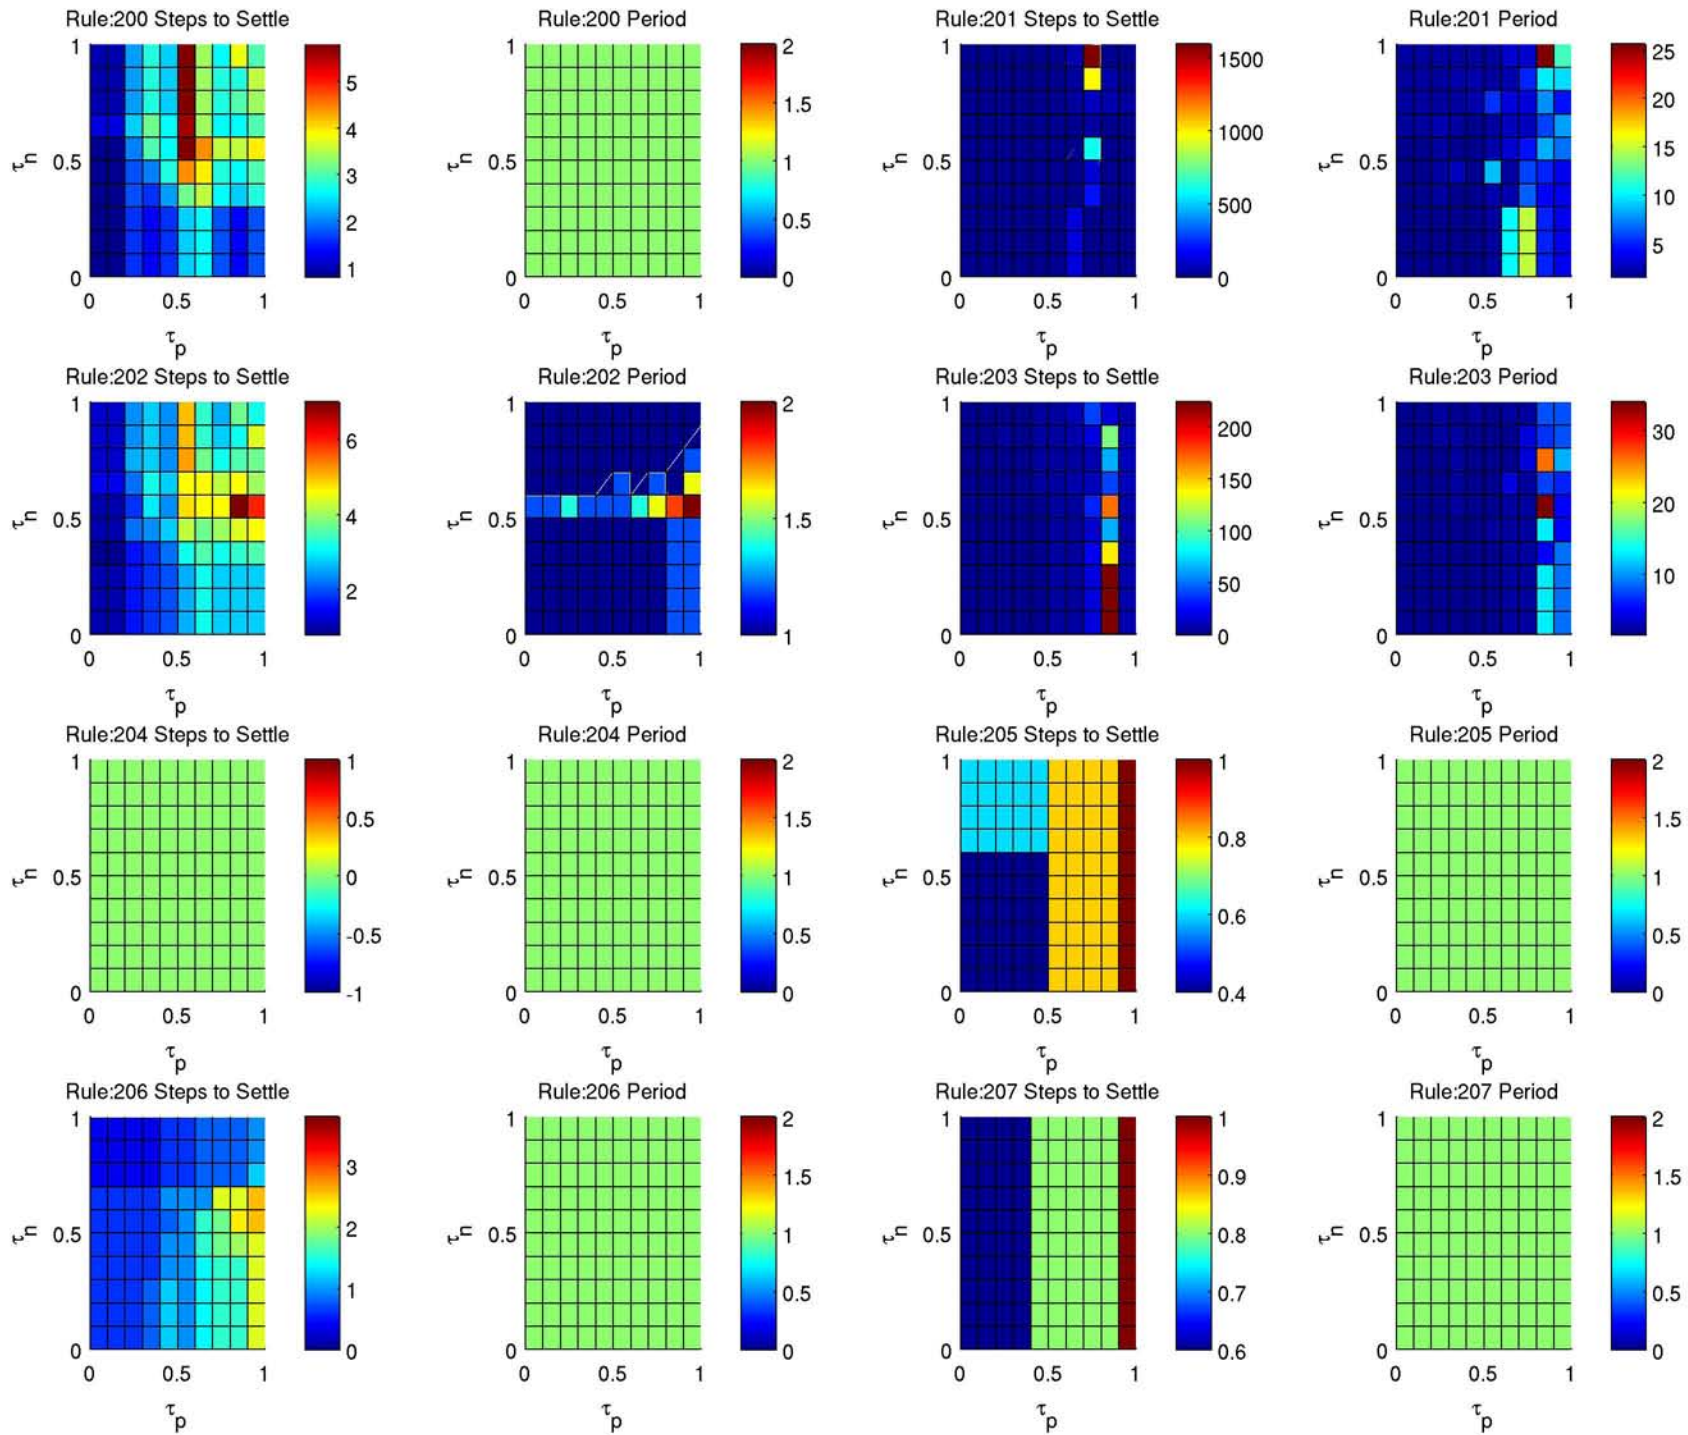

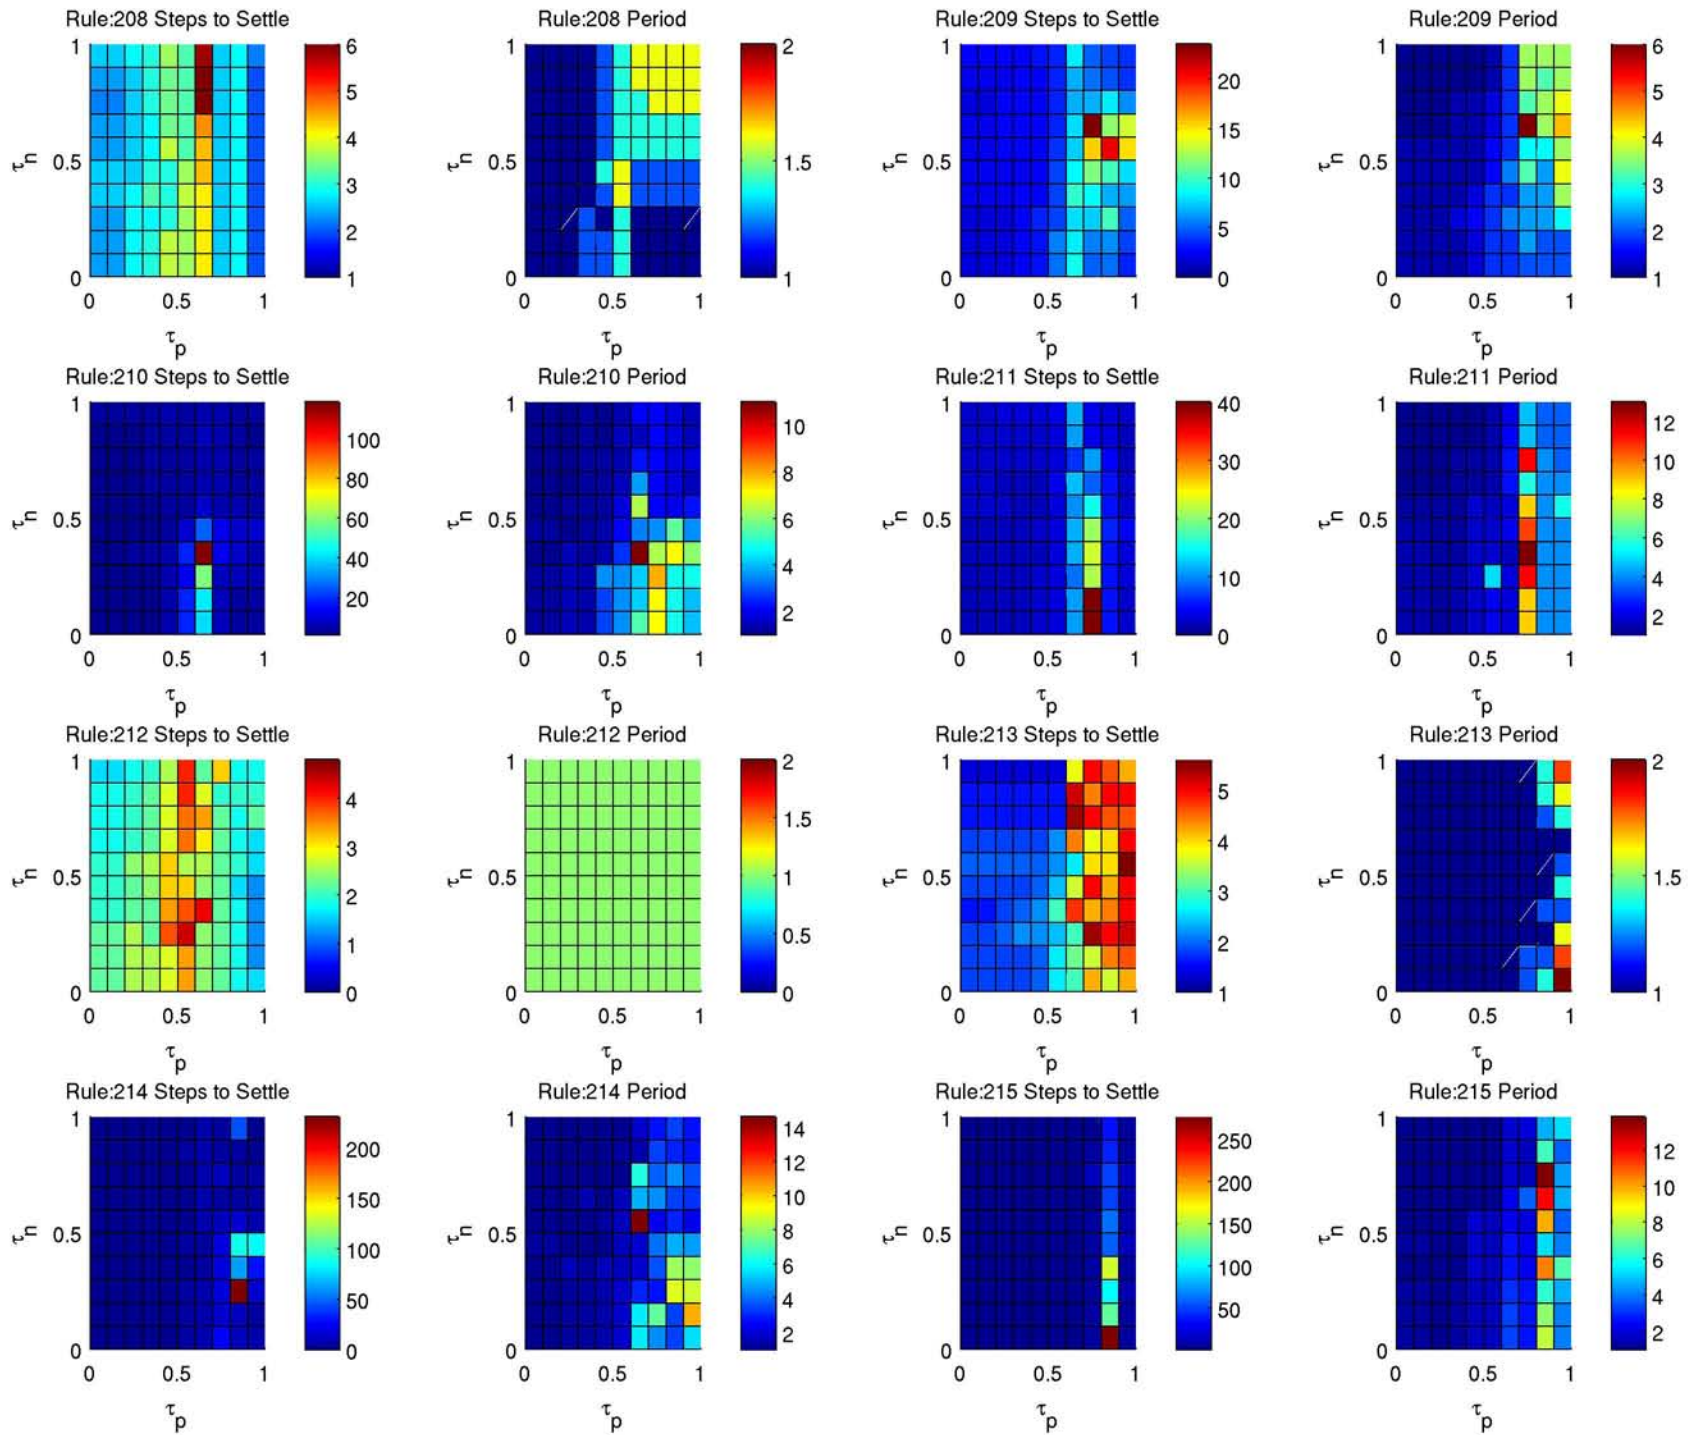



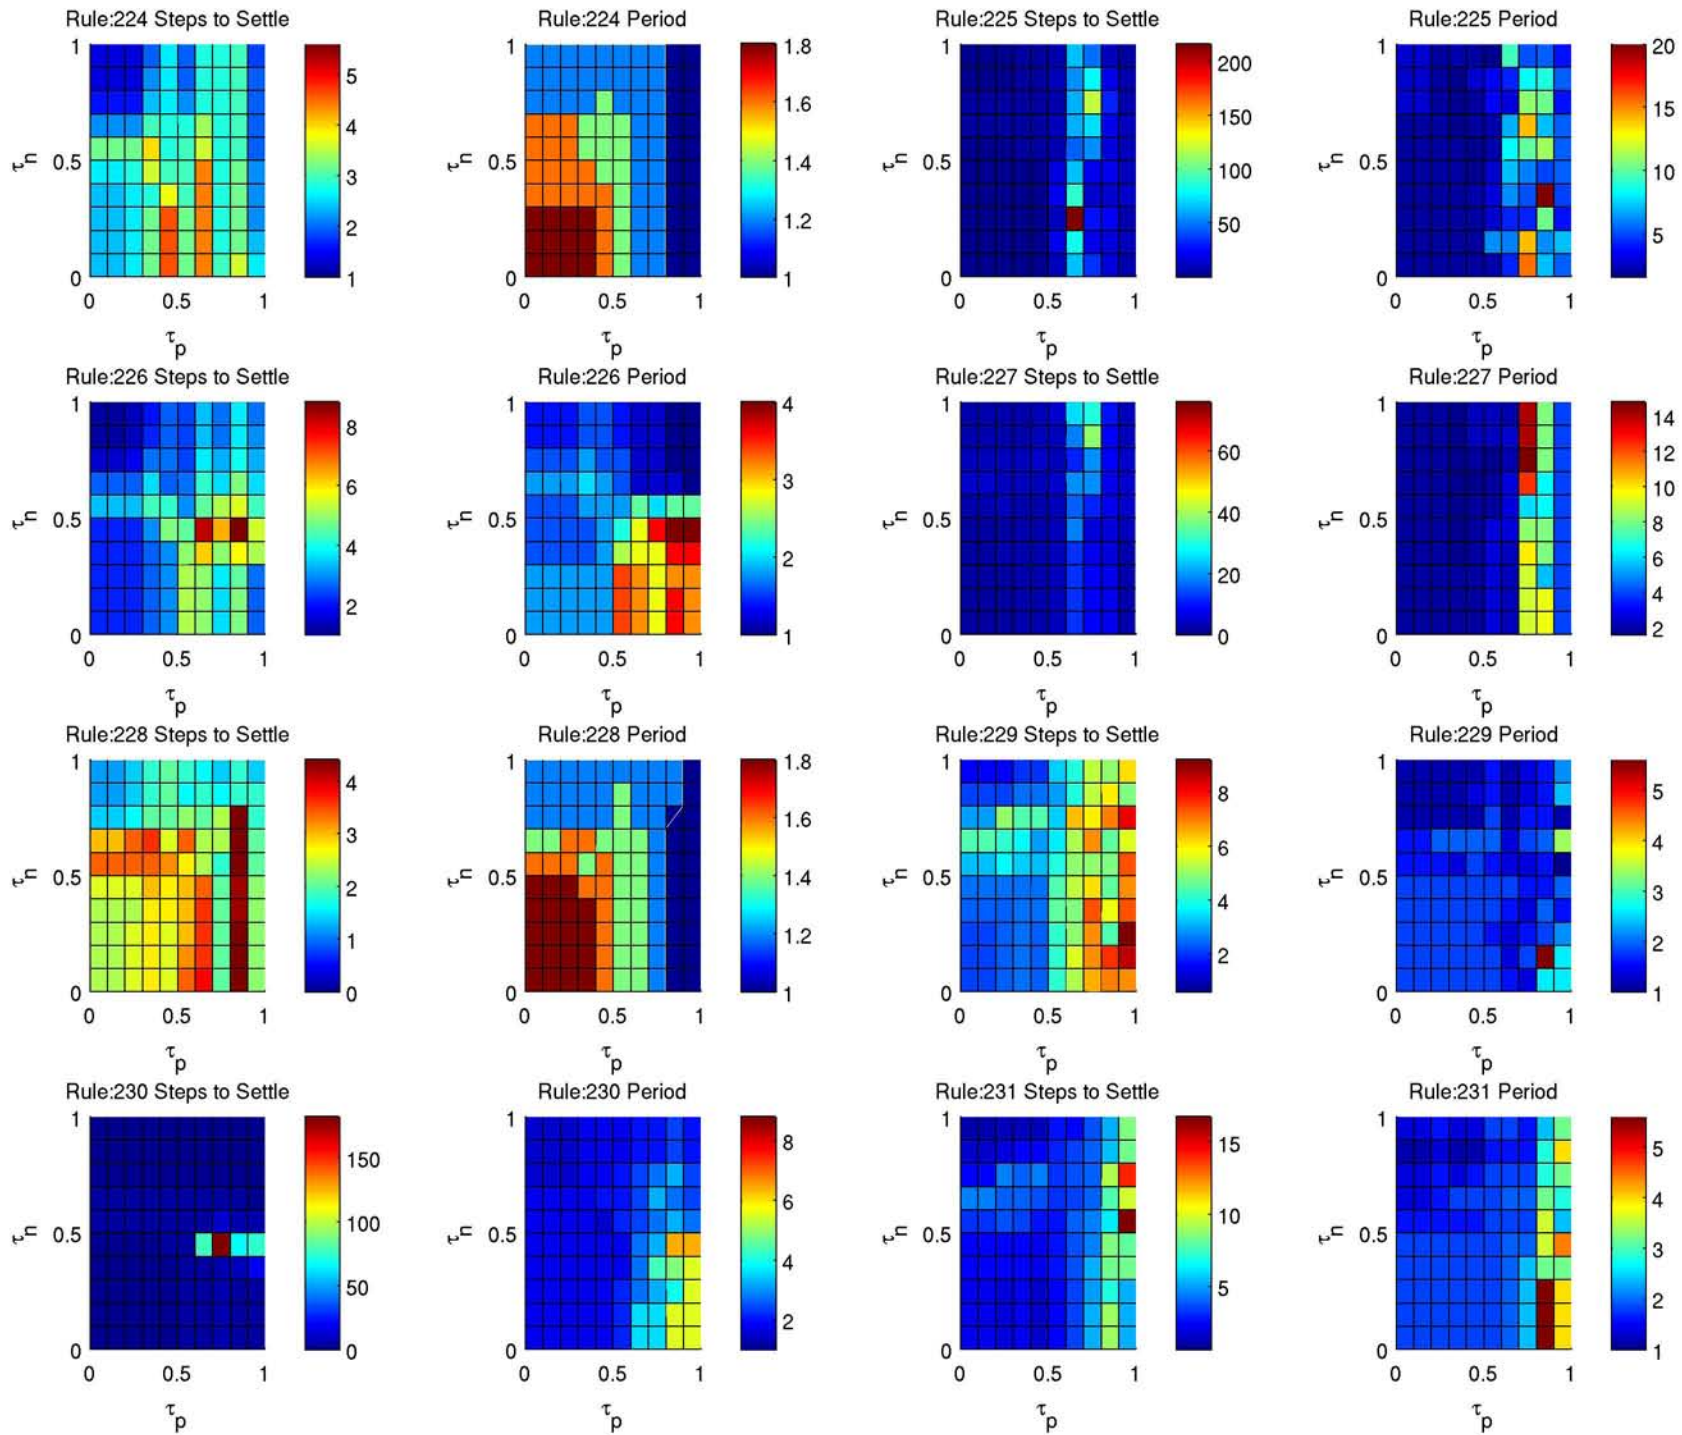

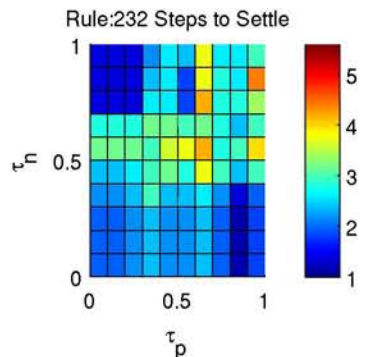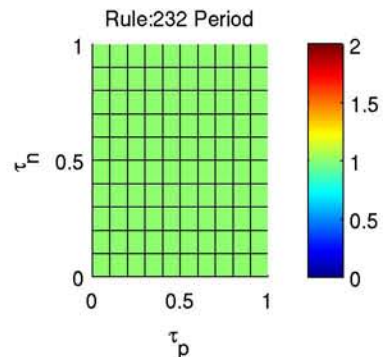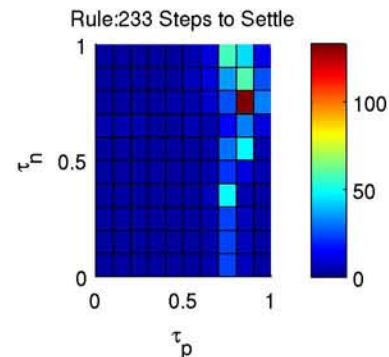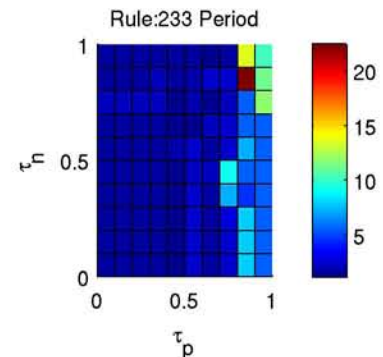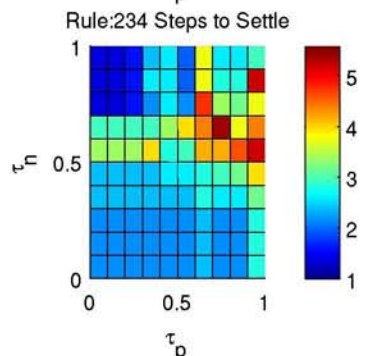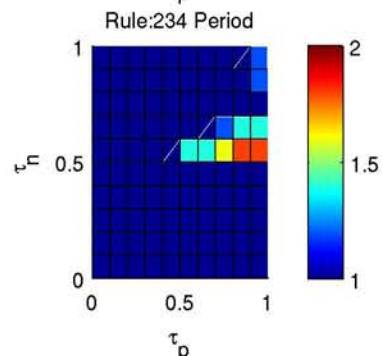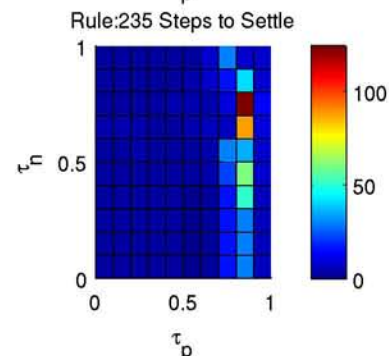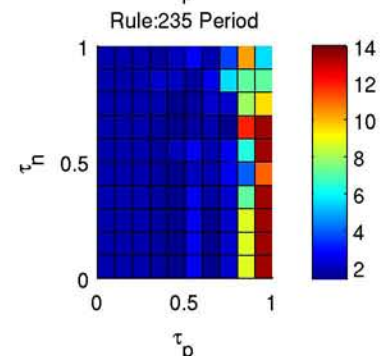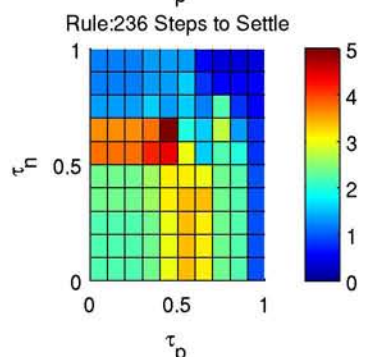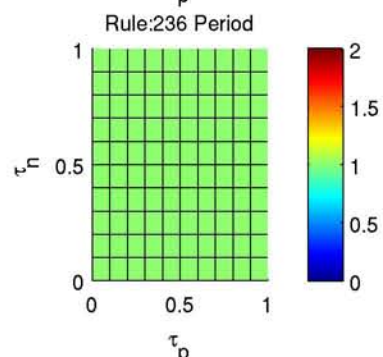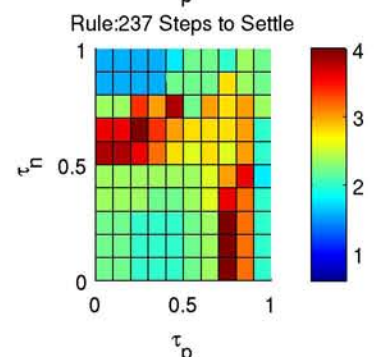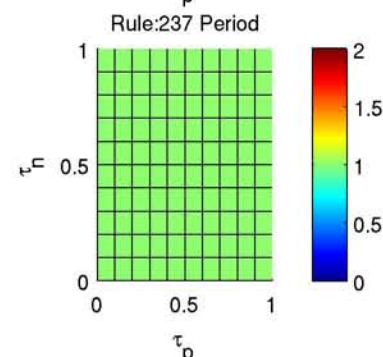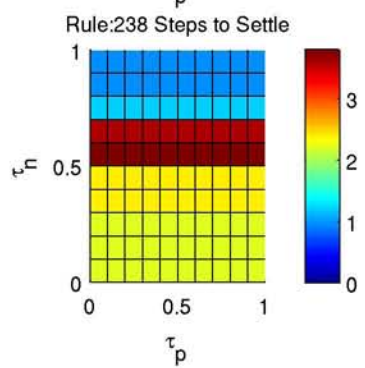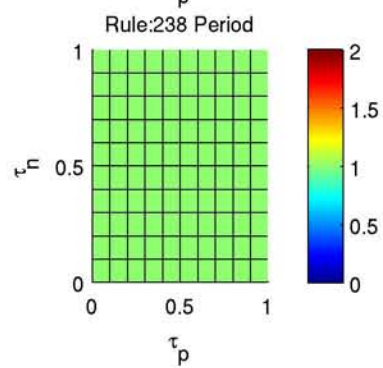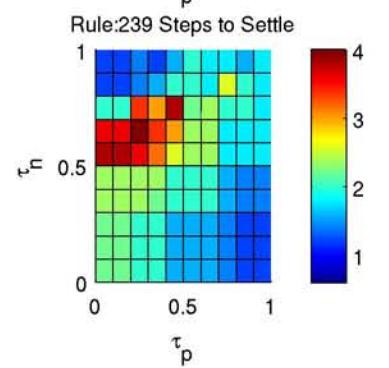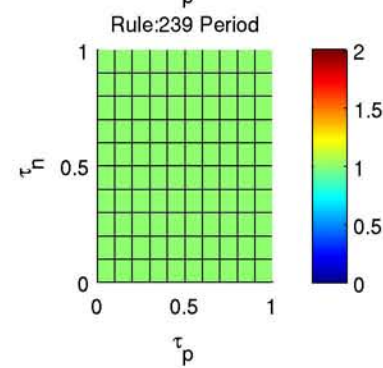





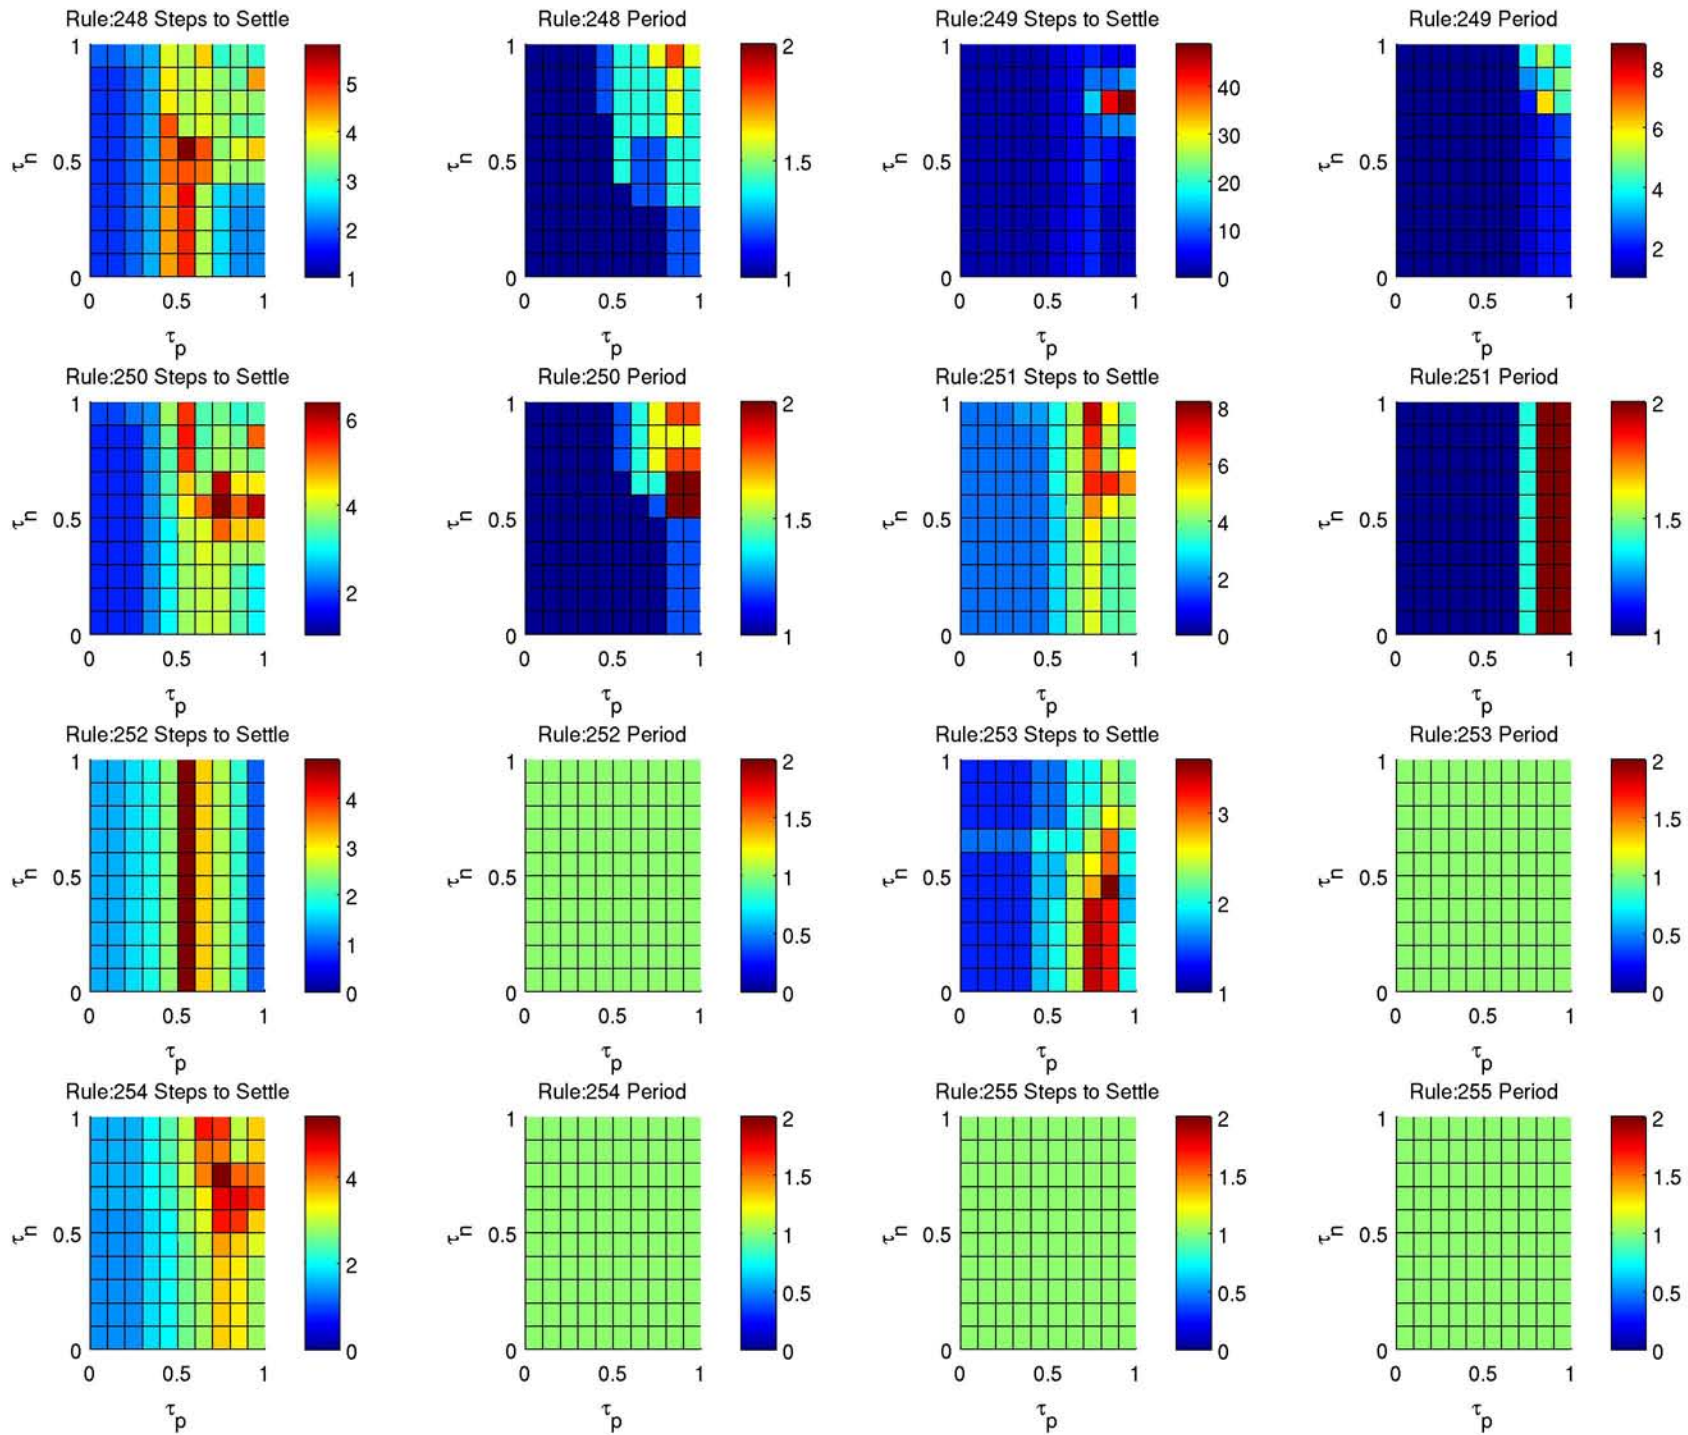

Supplement: NIHMS385576-supplement-02.pdf [file NIHMS385576-supplement-02.pdf]
